# Supplementary material for: Direct synthesis of nitroaryl acetylenes from acetylenes and nitroarenes via oxidative nucleophilic substitution of hydrogen
Source: Royal Society of Chemistry journal article supplement (doi:10.1039/c6cc07475h), 2016-01-01

**Electronic Supplementary Material (ESI) for ChemComm.**

**This Journal is © the Royal Society of Chemistry 2016**

**SUPPORTING INFORMATION**

**Direct synthesis of nitroaryl acetylenes from acetylenes and nitroarenes *via* oxidative nucleophilic substitution of hydrogen.**

R. Bujok and M. Małkosza\*

Institute of Organic Chemistry Polish Academy of Sciences, ul. Kasprzaka 44/52, 01-224 Warsaw, Poland, e-mail: icho-s@icho.edu.pl

|                                                                                                                        |          |
|------------------------------------------------------------------------------------------------------------------------|----------|
| <b>1. General information .....</b>                                                                                    | <b>2</b> |
| <b>2. General procedures for synthesis of the acetylenes. ....</b>                                                     | <b>2</b> |
| <b>2.1. Synthesis of the dinitrophenylacetylenes from <i>m</i>-dinitrobenzene. ....</b>                                | <b>2</b> |
| <b>2.2. Synthesis of the nitroarylacetylenes from other nitrobenzenes, 1-nitronaphthalene and nitropyridines .....</b> | <b>2</b> |
| <b>3. Copies of <sup>1</sup>H and <sup>13</sup>C nmr spectra of the compounds 1-7.....</b>                             | <b>2</b> |

## 1. General information

$^1\text{H}$  and  $^{13}\text{C}$  NMR spectra were recorded on a Bruker 500 MHz (500 MHz for  $^1\text{H}$  and 125 MHz  $^{13}\text{C}$  spectra), a Varian-NMR-vnmrs600 (600 MHz for  $^1\text{H}$  and 150 MHz  $^{13}\text{C}$  spectra) instruments. Chemical shifts  $\delta$  are expressed in ppm referred to TMS (internal standards), and coupling constants in Hertz. Multiplicities are reported as follows: singlet (s), doublet (d), doublet of doublets (dd), triplet (t), quartet (q) and multiplet (m). Electrospray mass spectra (ESI) were obtained on SYNAPT G2-S HDMS. Infrared spectra are recorded on a Perkin-Elmer Model 1600 FT-IR spectrophotometer.

**Materials and Methods:** THF was dried using sodium/benzophenone under an argon atmosphere and distilled prior to use. Silica gel (Merck 60, 230-400 mesh) was used for column chromatography. Hexane or hexane/ethyl acetate mixtures were used for elution. TLC analyses were performed on Merck Kieselgel 60 F<sub>254</sub> Alufolien with hexane/ethyl acetate mixtures. 1-Octyl 2,4-dinitrophenyl sulfide was obtained according to literature method.<sup>1</sup> Other chemicals were obtained from commercial sources and used directly.

## 2. General procedures for synthesis of the acetylenes.

### 2.1. Synthesis of the dinitrophenylacetylenes from *m*-dinitrobenzene.

To a solution of acetylene (3.0 mmol) and HMPA (0.59 mL, 0.60 g, 3.3 mmol) in dry THF (10 mL) at  $-70\text{ }^\circ\text{C}$  under argon, 2.5 M BuLi in hexane (1.2 mL, 3.0 mmol) was added in portions in 3 min. After the addition was completed, the mixture was stirred at  $-70\text{ }^\circ\text{C}$  for 30 min. A solution of the *m*-dinitrobenzene (0.25 g, 1.5 mmol) in THF (2.0 mL) was added (colour changed to blue immediately) and the resultant mixture was stirred for 10 min at  $-70\text{ }^\circ\text{C}$ . A solution of 0.68 g (3.0 mmol) of DDQ in THF (2.0 mL) was added and the mixture was stirred at  $-70\text{ }^\circ\text{C}$  for 20 min. The cooling bath was removed, the mixture was stirred for 1h at RT, then concentrated and the residue was subject to column chromatography ( $\text{SiO}_2$ , hexane/AcOEt).

### 2.2. Synthesis of the nitroarylacetylenes from other nitrobenzenes, 1-nitronaphthalene and nitropyridines

To a mixture of acetylene (3.0 mmol) in dry THF (7 mL) and HMPA (5 mL) at  $-70\text{ }^\circ\text{C}$  under argon, 2.5 M BuLi in hexane (1.2 mL, 3.0 mmol) was added in portions in 4 min. After the

---

<sup>1</sup> R. W. Bost, P. K. Starnes, E. L. Wood, *J. Am. Chem. Soc.*, 1951, **73**, 1968

addition was completed, the mixture was stirred at  $-70\text{ }^{\circ}\text{C}$  for 30 min. A solution of the nitroarene (1.5 mmol) in THF (2.0 mL) was added (colour changed to brown or dark-green immediately) and the resultant mixture was stirred for 1h at  $-70\text{ }^{\circ}\text{C}$ . A solution of 0.68 g (3.0 mmol) of DDQ in THF (2.0 mL) was added and the mixture was stirred at  $-70\text{ }^{\circ}\text{C}$  for 20 min. The cooling bath was removed, the mixture was stirred for 1h at RT, then concentrated and the residue was subject to column chromatography ( $\text{SiO}_2$ , hexane/AcOEt)

**1,3-Dinitro-4-(phenylethynyl)benzene (1a).** Yellow solid (0.224 g, 56%), mp. 111 – 113  $^{\circ}\text{C}$  (lit. mp. 109 – 110  $^{\circ}\text{C}$ )<sup>2</sup>. IR (KBr): 3119, 2213, 1606, 1592, 1535, 1519, 1336, 1065, 1011, 834, 765, 738, 690  $\text{cm}^{-1}$ .  $^1\text{H}$  NMR (500 MHz,  $\text{CDCl}_3$ ):  $\delta$  8.94 (d,  $J = 2.2$  Hz, 1H), 8.43 (dd,  $J = 8.6$  Hz, 2.2 Hz, 1H), 7.90 (d,  $J = 8.6$  Hz, 1H), 7.61 – 7.65 (m, 2H), 7.40 – 7.48 (m, 3H).  $^{13}\text{C}$  NMR (125 MHz,  $\text{CDCl}_3$ ):  $\delta$  149.4, 146.3, 135.5, 132.4, 130.4, 128.7, 126.9, 124.9, 121.3, 120.5, 103.6, 83.9.

**1,3-Dinitro-2-(phenylethynyl)benzene (1a').** Orange solid (0.064 g, 16%), mp. 100 – 103  $^{\circ}\text{C}$  (lit. mp. 105  $^{\circ}\text{C}$ )<sup>3</sup>.  $^1\text{H}$  NMR (500 MHz,  $\text{CDCl}_3$ ):  $\delta$  8.18 (d,  $J = 8.0$  Hz, 2H), 7.56 – 7.64 (m, 3H), 7.36 – 7.46 (m, 3H).  $^{13}\text{C}$  NMR (125 MHz,  $\text{CDCl}_3$ ):  $\delta$  151.6, 132.5, 130.4, 128.6, 128.1, 128.0, 121.3, 113.6, 106.0, 78.6.

**4-(4-Methoxy-phenylethynyl)-1,3-dinitrobenzene (1c).** Yellow–brown solid (0.202 g, 45%), mp. 170 – 173  $^{\circ}\text{C}$  (lit. mp 175 - 177  $^{\circ}\text{C}$ )<sup>2</sup>. IR (KBr): 3096, 2937, 2204, 1596, 1513, 1337, 1254, 1138, 1026, 835  $\text{cm}^{-1}$ .  $^1\text{H}$  NMR (500 MHz,  $\text{CDCl}_3$ ):  $\delta$  8.94 (d,  $J = 2.2$  Hz, 1H), 8.41 (dd,  $J = 8.6$  Hz, 2.2 Hz, 1H), 7.85 (d,  $J = 8.6$  Hz, 1H), 7.57 – 7.59 and 6.92 – 6.94 (4H, AA'XX'), 3.86 (s, 3H).  $^{13}\text{C}$  NMR (125 MHz,  $\text{CDCl}_3$ ):  $\delta$  161.4, 145.8, 135.2, 134.4, 128.0, 126.8, 125.4, 120.6, 114.4, 113.3, 104.7, 83.7, 55.4. HRMS–ESI ( $m/z$ ):  $[\text{M}+\text{Na}]^+$  calcd for  $\text{C}_{15}\text{H}_{10}\text{N}_2\text{O}_5\text{Na}$ , 321.0487; found: 321.0485.

**2-(4-Methoxy-phenylethynyl)-1,3-dinitrobenzene (1c').** Yellow–brown solid (0.112 g, 25%), mp. 176 – 179  $^{\circ}\text{C}$ . IR (KBr): 3086, 2940, 2209, 1600, 1531, 1511, 1343, 1252, 1170, 1028, 828, 740  $\text{cm}^{-1}$ .  $^1\text{H}$  NMR (500 MHz,  $\text{CDCl}_3$ ):  $\delta$  8.17 (d,  $J = 8.0$  Hz, 2H), 7.52 – 7.58 (m, 3H), 6.91 – 6.92 (AA'XX', 2H), 3.85 (s, 3H).  $^{13}\text{C}$  NMR (125 MHz,  $\text{CDCl}_3$ ):  $\delta$  161.4, 151.4, 134.4, 128.0, 127.3, 114.3, 114.1, 113.3, 107.1, 78.2, 55.4. HRMS–ESI ( $m/z$ ):  $[\text{M}+\text{Na}]^+$  calcd for  $\text{C}_{15}\text{H}_{10}\text{N}_2\text{O}_5\text{Na}$ , 321.0487; found: 321.0487.

---

<sup>2</sup> B. Prueger, G. E. Hofmeister, C. B. Jacobsen, D. G. Alberg, M. Nielsen, K. A. Jorgensen, *Chem. Eur. J.*, 2010, **16**, 3783

<sup>3</sup> S. D. Carter, T. W. Wallace, *J. Chem. Res.*, 1985, **5**, 1601

**1-Methoxy-2,4-dinitro-5-(phenylethynyl)benzene (2a).** Orange solid (0.048 g, 10%), mp. 126 – 129 °C. IR (KBr): 2942, 2211, 1611, 1584, 1523, 1335, 1301, 1250, 1042, 982, 831, 765, 693 cm<sup>-1</sup>. <sup>1</sup>H NMR (500 MHz, CDCl<sub>3</sub>): δ 8.76 (s, 1H), 7.63 – 7.66 (m, 2H), 7.40 – 7.46 (m, 3H), 7.33 (s, 1H), 4.11 (s, 3H). <sup>13</sup>C NMR (125 MHz, CDCl<sub>3</sub>): δ 155.7, 132.4, 132.0, 130.3, 128.7, 128.5, 125.2, 123.7, 121.4, 118.3, 102.1, 84.3, 57.5. HRMS–ESI (*m/z*): [M+Na]<sup>+</sup> calcd for C<sub>15</sub>H<sub>10</sub>N<sub>2</sub>O<sub>5</sub>Na, 321.0487; found: 321.0479.

**1-Methoxy-2,4-dinitro-3-(phenylethynyl)benzene (2a’).** Yellow solid (0.200 g, 45%), mp. 145 – 148 °C. IR (KBr): 2952, 2204, 1610, 1578, 1541, 1518, 1343, 1305, 1268, 1065, 762, 688, 658 cm<sup>-1</sup>. <sup>1</sup>H NMR (500 MHz, CDCl<sub>3</sub>): δ 8.31 (d, *J* = 9.3 Hz, 1H), 7.56 – 7.60 (m, 2H), 7.35 – 7.45 (m, 3H), 7.08 (d, *J* = 9.3 Hz, 1H), 4.03 (s, 3H). <sup>13</sup>C NMR (125 MHz, CDCl<sub>3</sub>): δ 154.1, 132.5, 130.3, 128.5, 127.9, 121.1, 114.4, 111.3, 104.7, 78.3, 57.3. HRMS–ESI (*m/z*): [M+Na]<sup>+</sup> calcd for C<sub>15</sub>H<sub>10</sub>N<sub>2</sub>O<sub>5</sub>Na, 321.0487; found: 321.0480.

**2,4-Dinitro-1-octylsulfanyl-5-(phenylethynyl)benzene (3a).** Orange–brown oil (0.065 g, 11%). <sup>1</sup>H NMR (600 MHz, CDCl<sub>3</sub>): δ 9.04 (s, 1H), 7.64 – 7.66 (m, 2H), 7.60 (s, 1H), 7.41 – 7.46 (m, 3H), 3.07 (t, *J* = 7.5 Hz, 2H), 1.80 – 1.85 (m, 2H), 1.52 – 1.58 (m, 2H), 1.24 – 1.36 (m, 8H), 0.88 (t, *J* = 7.2 Hz, 3H). <sup>13</sup>C NMR (150 MHz, CDCl<sub>3</sub>): δ 145.6, 144.1, 142.8, 132.4, 131.3, 130.3, 128.6, 128.5, 123.3, 121.4, 102.2, 84.3, 33.9, 32.7, 31.7, 29.1, 29.0, 27.3, 22.6, 14.0. EI (*m/z*): 412 (6, M<sup>+</sup>), 411 (18), 299 (14), 187 (18), 181 (17), 169 (15), 131 (25).

**2,4-Dinitro-1-octylsulfanyl-3-(phenylethynyl)benzene (3a’).** Orange solid (0.483 g, 78%), mp. 54 – 56 °C. IR (KBr): 2957, 2925, 2852, 2218, 1584, 1558, 1539, 1515, 1335, 931, 825, 758, 688 cm<sup>-1</sup>. <sup>1</sup>H NMR (600 MHz, CDCl<sub>3</sub>): δ 8.17 (d, *J* = 8.4 Hz, 1H), 7.57 – 7.59 (m, 2H), 7.37 – 7.45 (m, 4H), 3.04 (t, *J* = 7.5 Hz, 2H), 1.66 – 1.74 (m, 2H), 1.40 – 1.48 (m, 2H), 1.22 – 1.36 (m, 8H), 0.88 (t, *J* = 7.2 Hz, 3H). <sup>13</sup>C NMR (150 MHz, CDCl<sub>3</sub>): δ 152.4, 146.0, 138.7, 132.4, 130.3, 128.5, 126.7, 125.8, 121.1, 113.4, 104.8, 78.4, 33.4, 31.7, 29.0, 28.9, 28.7, 28.4, 22.6, 14.0. HRMS–ESI (*m/z*): [M+Na]<sup>+</sup> calcd for C<sub>22</sub>H<sub>24</sub>N<sub>2</sub>O<sub>4</sub>SNa, 435.1354; found: 435.1354

**2-Nitro-1-phenylethynyl-4-trifluoromethylbenzene (4a).**<sup>4</sup> Yellow–orange solid (0.198 g, 45%), mp. 55 – 57 °C. IR (KBr): 2214, 1627, 1534, 1321, 1184, 1124, 1082, 900, 840, 763, 689 cm<sup>-1</sup>. <sup>1</sup>H NMR (500 MHz, CDCl<sub>3</sub>): δ 8.36 (s, 1H), 7.82 – 7.87 (m, 2H), 7.61 – 7.64 (m, 2H), 7.38 – 7.46 (m, 3H), <sup>13</sup>C NMR (125 MHz, CDCl<sub>3</sub>): δ 149.4, 135.3, 132.3, 130.5 (q, *J* = 35 Hz), 129.9, 129.2 (q, *J* = 3.5 Hz), 128.6, 122.7 (q, *J* = 272 Hz), 122.4, 122.2 (q, *J* = 3.5

---

<sup>4</sup> R. Zhou, W. Wang, Z.-J. Jiang, H.-Y. Fu, X.-L. Zheng, C.-C. Zhang, H. Chen, R.-X. Li, *Catalysis Science and Technology*, 2014, **4**, 746

Hz), 121.7, 100.4, 83.8.  $^{19}\text{F}$  NMR (500 MHz,  $\text{CDCl}_3$ ):  $\delta$  -63.0 (s), HRMS–ESI ( $m/z$ ):  $[\text{M}+\text{Na}]^+$  calcd for  $\text{C}_{15}\text{H}_8\text{NO}_2\text{F}_3\text{Na}$ , 314.0405; found: 314.0403.

**1-Nitro-2-phenylethynyl-3-trifluoromethylbenzene (4a')**. Yellow–orange oil. (0.026g, 6%),  $^1\text{H}$  NMR (500 MHz,  $\text{CDCl}_3$ ):  $\delta$  8.15 (d,  $J = 8.1$  Hz, 1H), 7.96 (d,  $J = 8.1$  Hz, 1H), 7.60 – 7.63 (m, 2H), 7.54 – 7.58 (m, 1H), 7.38 – 7.46 (m, 3H),  $^{13}\text{C}$  NMR (125 MHz,  $\text{CDCl}_3$ ):  $\delta$  151.6, 134.0 (q,  $J = 31$  Hz), 133.3, 132.2, 130.0 (q,  $J = 6.3$  Hz), 128.6 (q,  $J = 9.1$  Hz), 128.0, 127.3, 122.6 (q,  $J = 273$  Hz), 121.7, 117.1, 104.2, 79.8.  $^{19}\text{F}$  NMR (500 MHz,  $\text{CDCl}_3$ ):  $\delta$  -62.5 (s), HRMS–EI ( $m/z$ ):  $\text{M}^+$  calcd for  $\text{C}_{15}\text{H}_8\text{NO}_2\text{F}_3$ , 291.0507; found: 291.0508.

**1-Nitro-2-(phenylethynyl)naphthalene (5a)**. Light–brown solid (0.171 g, 42%), mp. 100 – 102 °C. IR (KBr): 2210, 1598, 1526, 1375, 1337, 864, 817, 757, 688  $\text{cm}^{-1}$ .  $^1\text{H}$  NMR (500 MHz,  $\text{CDCl}_3$ ):  $\delta$  7.94 (d,  $J = 8.4$  Hz, 1H), 7.89 (d,  $J = 8.2$  Hz, 1H), 7.82 (d,  $J = 8.2$  Hz, 1H), 7.54 – 7.67 (m, 5H), 7.36 – 7.40 (m, 3H),  $^{13}\text{C}$  NMR (125 MHz,  $\text{CDCl}_3$ ):  $\delta$  150.0, 133.1, 132.0, 130.5, 129.3, 129.1, 128.6, 128.2, 128.0, 127.9, 124.3, 122.0, 121.8, 114.3, 97.2, 83.3. HRMS–ESI ( $m/z$ ):  $[\text{M}+\text{Na}]^+$  calcd for  $\text{C}_{18}\text{H}_{11}\text{NO}_2\text{Na}$ , 296.0687; found: 296.0687.

**3-Nitro-4-(phenylethynyl)pyridine (6a)**. Light–brown solid (0.242 g, 78%), mp. 114 – 116 °C. IR (KBr): 3054, 2218, 1603, 1589, 1535, 1348, 836, 762  $\text{cm}^{-1}$ .  $^1\text{H}$  NMR (600 MHz,  $\text{CDCl}_3$ ):  $\delta$  9.31 (s, 1H), 8.78 (d,  $J = 5.1$  Hz, 1H), 7.62 – 7.65 (m, 2H), 7.59 (d,  $J = 5.1$  Hz, 1H), 7.40 – 7.46 (m, 3H).  $^{13}\text{C}$  NMR (125 MHz,  $\text{CDCl}_3$ ):  $\delta$  153.0, 146.1, 144.8, 132.5, 130.3, 128.6, 127.4, 126.9, 121.2, 102.9, 82.9. HRMS–ESI ( $m/z$ ):  $[\text{M}+\text{H}]^+$  calcd for  $\text{C}_{13}\text{H}_9\text{N}_2\text{O}_2$ , 225.0664; found: 225.0658.

**3-Nitro-4-(4-tolyethynyl)pyridine (6b)**. Light–yellow solid (0.255 g, 72%), mp. 90 – 91 °C. IR (KBr): 3054, 2917, 2213, 1593, 1534, 1508, 1345, 1224, 815  $\text{cm}^{-1}$ .  $^1\text{H}$  NMR (500 MHz,  $\text{CDCl}_3$ ):  $\delta$  9.30 (s, 1H), 8.76 (d,  $J = 5.1$  Hz, 1H), 7.56 (d,  $J = 5.1$  Hz, 1H), 7.52 – 7.54 and 7.21 – 7.23 (4H, AA'XX'), 2.40 (s, 3H).  $^{13}\text{C}$  NMR (125 MHz,  $\text{CDCl}_3$ ):  $\delta$  152.9, 146.1, 141.0, 132.5, 129.4, 127.3, 127.1, 118.2, 103.5, 82.6, 21.7. HRMS–ESI ( $m/z$ ):  $[\text{M}+\text{H}]^+$  calcd for  $\text{C}_{14}\text{H}_{11}\text{N}_2\text{O}_2$ , 239.0821; found: 239.0822.

**4-(4-Methoxy-phenylethynyl)-3-nitropyridine (6c)**. Brown solid (0.277 g, 73%), mp. 153 – 155 °C. IR (KBr): 2219, 2196, 1596, 1346, 1255, 828  $\text{cm}^{-1}$ .  $^1\text{H}$  NMR (500 MHz,  $\text{CDCl}_3$ ):  $\delta$  9.29 (s, 1H), 8.74 (d,  $J = 5.1$  Hz, 1H), 7.57 – 7.59 and 6.92 – 6.94 (4H, AA'XX'), 7.54 (d,  $J = 5.1$  Hz, 1H), 3.86 (s, 3H).  $^{13}\text{C}$  NMR (125 MHz,  $\text{CDCl}_3$ ):  $\delta$  161.4, 152.8, 146.2, 134.4, 127.3, 127.1, 114.4, 113.3, 103.9, 82.5, 55.4. HRMS–ESI ( $m/z$ ):  $[\text{M}+\text{H}]^+$  calcd for  $\text{C}_{14}\text{H}_{11}\text{N}_2\text{O}_3$ , 255.0770; found: 255.0768.

**6-Methoxy-3-nitro-2-(phenylethynyl)pyridine (7a)**. Light–brown solid (0.295 g, 77%), mp. 116 – 117 °C. IR (KBr): 3090, 2217, 1582, 1324, 1065, 1011, 835, 758  $\text{cm}^{-1}$ .  $^1\text{H}$  NMR

(500 MHz, CDCl<sub>3</sub>):  $\delta$  8.32 (d,  $J$  = 9.1 Hz, 1H), 7.68 – 7.72 (m, 2H), 7.38 – 7.44 (m, 3H), 6.78 (d,  $J$  = 9.1 Hz, 1H), 4.08 (s, 3H). <sup>13</sup>C NMR (125 MHz, CDCl<sub>3</sub>):  $\delta$  165.4, 141.7, 136.6, 135.5, 132.6, 129.9, 128.5, 121.6, 111.1, 97.5, 86.0, 54.9. HRMS–ESI ( $m/z$ ): [M+H]<sup>+</sup> calcd for C<sub>14</sub>H<sub>11</sub>N<sub>2</sub>O<sub>3</sub>, 255.0770; found: 255.0767.

**6-Methoxy-3-nitro-2-(4-tolylethynyl)pyridine (7b).** Yellow solid (0.284 g, 71%), mp. 122 – 124 °C. IR (KBr): 3100, 2205, 1583, 1320, 1062, 1013, 812, 774 cm<sup>-1</sup>. <sup>1</sup>H NMR (500 MHz, CDCl<sub>3</sub>):  $\delta$  8.31 (d,  $J$  = 9.1 Hz, 1H), 7.58 – 7.60 and 7.20 – 7.22 (4H, AA'XX'), 6.75 (d,  $J$  = 9.1 Hz, 1H), 4.08 (s, 3H), 2.40 (s, 3H). <sup>13</sup>C NMR (125 MHz, CDCl<sub>3</sub>):  $\delta$  165.4, 141.6, 140.5, 136.8, 135.5, 132.6, 129.3, 118.6, 110.8, 98.2, 85.7, 54.9, 21.7. HRMS–ESI ( $m/z$ ): [M+H]<sup>+</sup> calcd for C<sub>15</sub>H<sub>13</sub>N<sub>2</sub>O<sub>3</sub>, 269.0926; found: 269.0924.

**2-(4-Methoxy-phenylethynyl)-6-methoxy-3-nitropyridine (7c).** Yellow–green solid (0.310 g, 73%), mp. 117– 119 °C. IR (KBr): 3076, 2955, 2199, 1742, 1581, 1511, 1325, 1252, 1154, 1063, 1013, 822, 773 cm<sup>-1</sup>. <sup>1</sup>H NMR (500 MHz, CDCl<sub>3</sub>):  $\delta$  8.31 (d,  $J$  = 9.1 Hz, 1H), 7.64 – 7.65 and 6.91 – 6.93 (4H, AA'XX'), 6.74 (d,  $J$  = 9.1 Hz, 1H), 4.08 (s, 3H), 3.85 (s, 3H). <sup>13</sup>C NMR (125 MHz, CDCl<sub>3</sub>):  $\delta$  165.4, 161.1, 141.4, 137.0, 135.5, 134.4, 114.2, 113.7, 110.6, 98.5, 85.5, 55.4, 54.9. HRMS–ESI ( $m/z$ ): [M+Na]<sup>+</sup> calcd for C<sub>15</sub>H<sub>12</sub>N<sub>2</sub>O<sub>4</sub>Na, 307.0695; found: 307.0689.

**2-(4-Fluoro-phenylethynyl)-6-methoxy-3-nitropyridine (7d).** Light–brown solid (0.340 g, 83%), mp. 101 – 102 °C. IR (KBr): 3093, 2211, 1580, 1323, 1064, 1016, 835, 775 cm<sup>-1</sup>. <sup>1</sup>H NMR (500 MHz, CDCl<sub>3</sub>):  $\delta$  8.32 (d,  $J$  = 9.1 Hz, 1H), 7.67 – 7.70 (m, 2H), 7.07 – 7.12 (m, 2H), 6.78 (d,  $J$  = 9.1 Hz, 1H), 4.08 (s, 3H). <sup>13</sup>C NMR (125 MHz, CDCl<sub>3</sub>):  $\delta$  165.4, 163.5 (d,  $J$  = 250 Hz), 136.5, 135.5, 134.7 (d,  $J$  = 8.7 Hz), 117.8 (d,  $J$  = 3.7 Hz), 116.0, 115.9, 111.2, 96.4, 85.8, 54.9. HRMS–ESI ( $m/z$ ): [M+H]<sup>+</sup> calcd for C<sub>14</sub>H<sub>10</sub>N<sub>2</sub>O<sub>3</sub>F, 273.0675; found: 273.0665.

**6-Methoxy-3-nitro-2-(trimethylsilanylethynyl)pyridine (7e).** Light–brown solid (0.255 g, 68%), mp. 92– 94 °C. IR (KBr): 2956, 2898, 2656, 2113, 1590, 1520, 1473, 1417, 1322, 1246, 1070, 1019, 954, 849, 774, 671 cm<sup>-1</sup>. <sup>1</sup>H NMR (500 MHz, CDCl<sub>3</sub>):  $\delta$  8.25 (d,  $J$  = 9.1 Hz, 1H), 6.76 (d,  $J$  = 9.1 Hz, 1H), 4.05 (s, 3H), 0.32 (s, 9H). <sup>13</sup>C NMR (125 MHz, CDCl<sub>3</sub>):  $\delta$  165.3, 142.4, 135.9, 135.3, 111.5, 105.0, 99.7, 54.9, -0.56. HRMS–ESI ( $m/z$ ): [M+H]<sup>+</sup> calcd for C<sub>11</sub>H<sub>15</sub>N<sub>2</sub>O<sub>3</sub>Si, 251.0852; found: 251.0855.

**2-(Hex-1-ynyl)-6-methoxy-3-nitropyridine (7f).** Yellow oil (0.132 g, 40%), IR (film): 2957, 2230, 1586, 1319, 1085, 1027, 1009, 835, 778 cm<sup>-1</sup>. <sup>1</sup>H NMR (500 MHz, CDCl<sub>3</sub>):  $\delta$  8.24 (d,  $J$  = 9.0 Hz, 1H), 6.72 (d,  $J$  = 9.0 Hz, 1H), 4.04 (s, 3H), 2.55 (t,  $J$  = 7.1 Hz, 2H), 1.65 – 1.71 (m, 2H), 1.49 – 1.57 (m, 2H), 0.97 (t,  $J$  = 7.1 Hz, 3H). <sup>13</sup>C NMR (125 MHz, CDCl<sub>3</sub>):  $\delta$  165.2,

141.9, 136.9, 135.4, 110.6, 100.8, 77.5, 54.8, 30.1, 22.0, 19.7, 13.6. HRMS-ESI ( $m/z$ ):  
[M+H]<sup>+</sup> calcd for C<sub>12</sub>H<sub>15</sub>N<sub>2</sub>O<sub>3</sub>, 235.1083; found: 235.1073.

### 3. Copies of $^1\text{H}$ and $^{13}\text{C}$ NMR spectra of the compounds 1-7

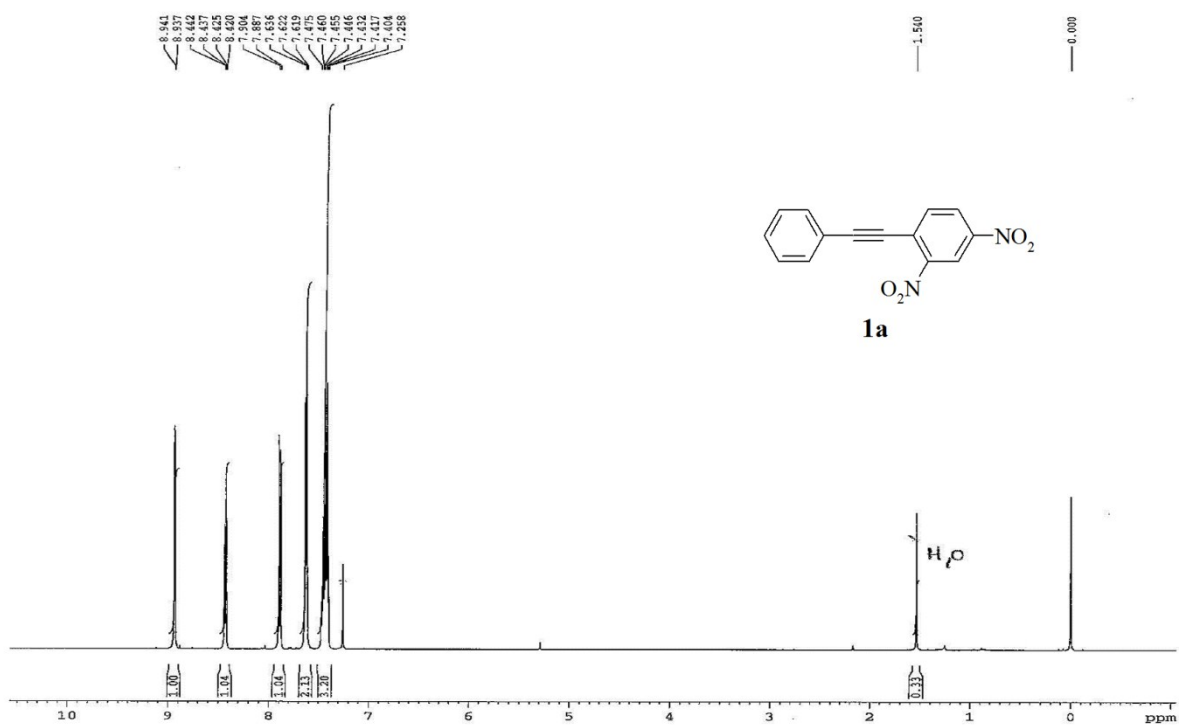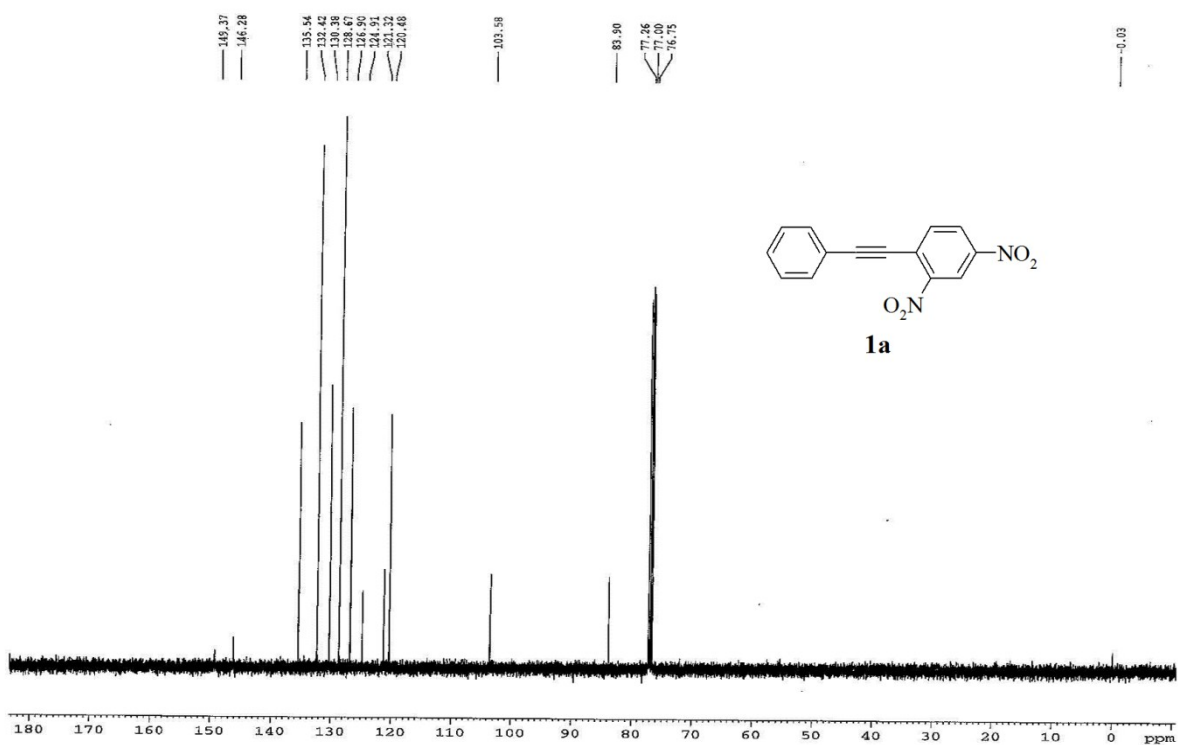



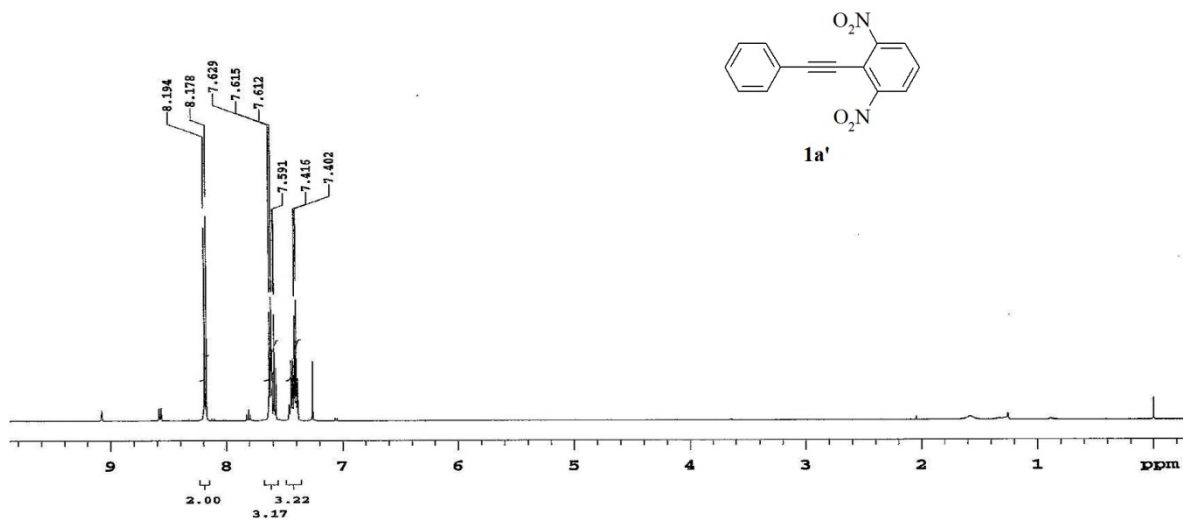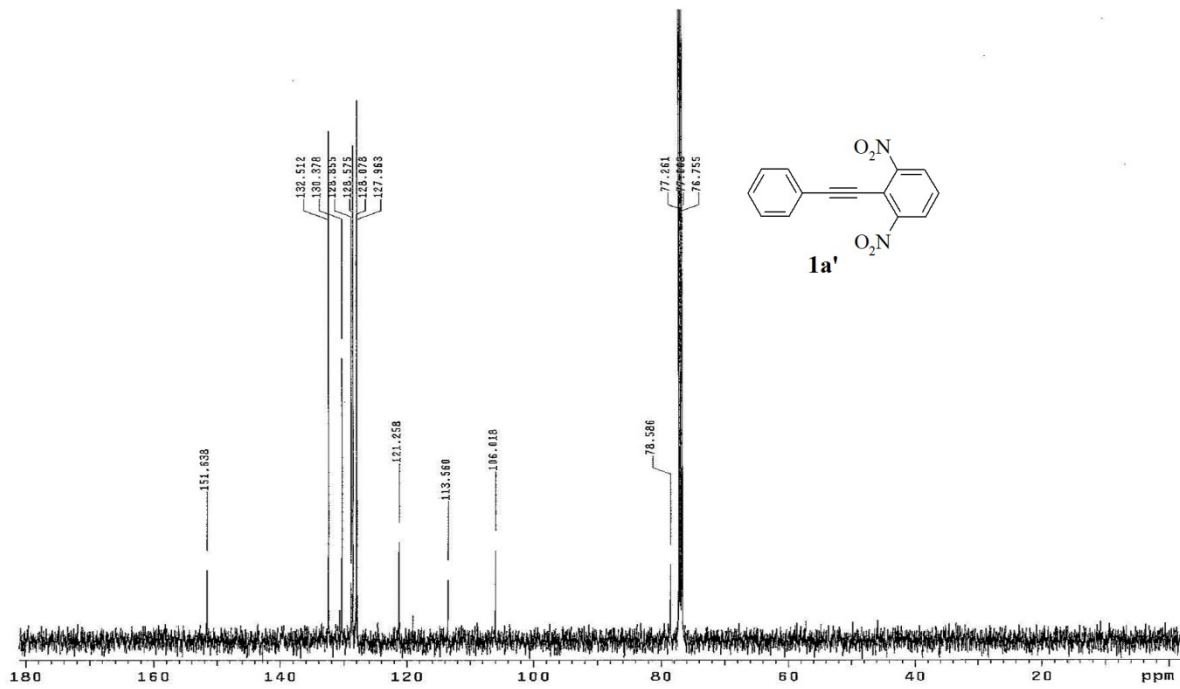

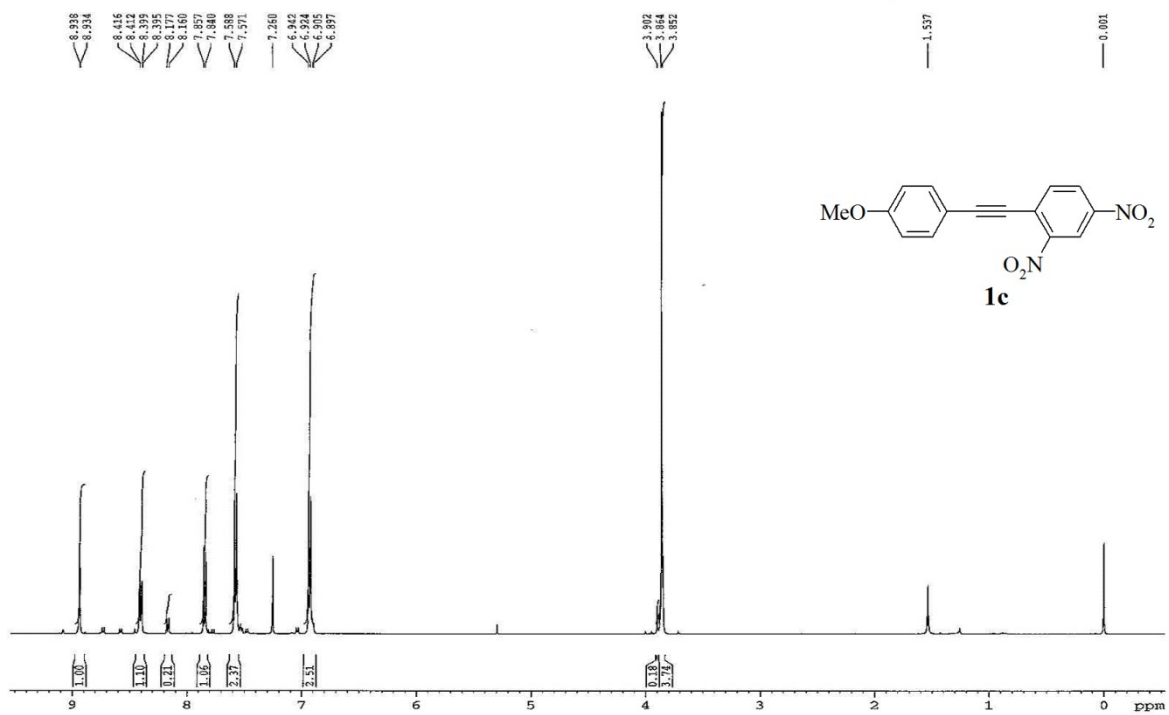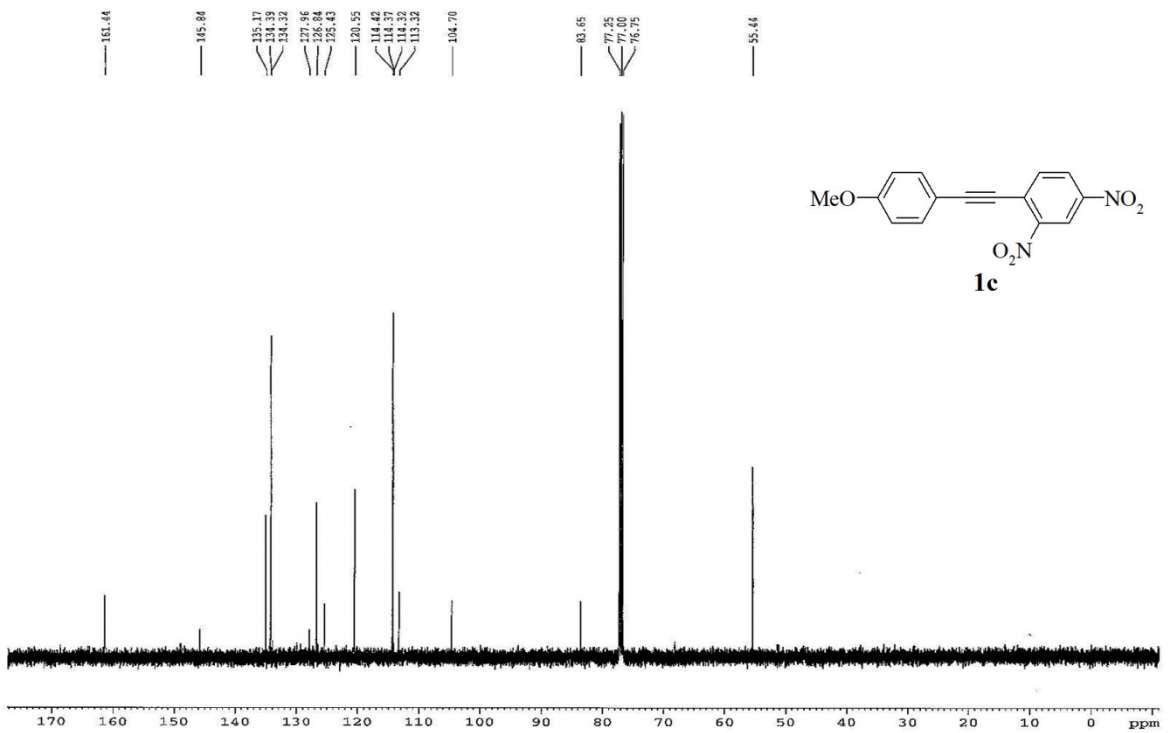

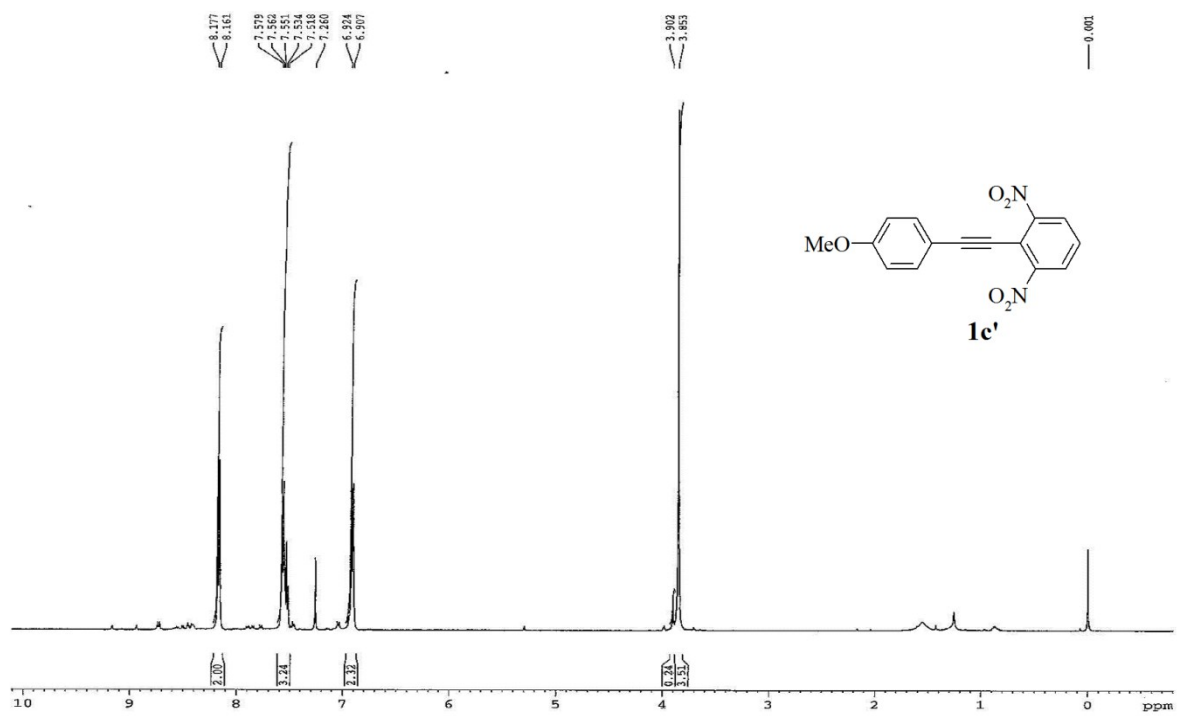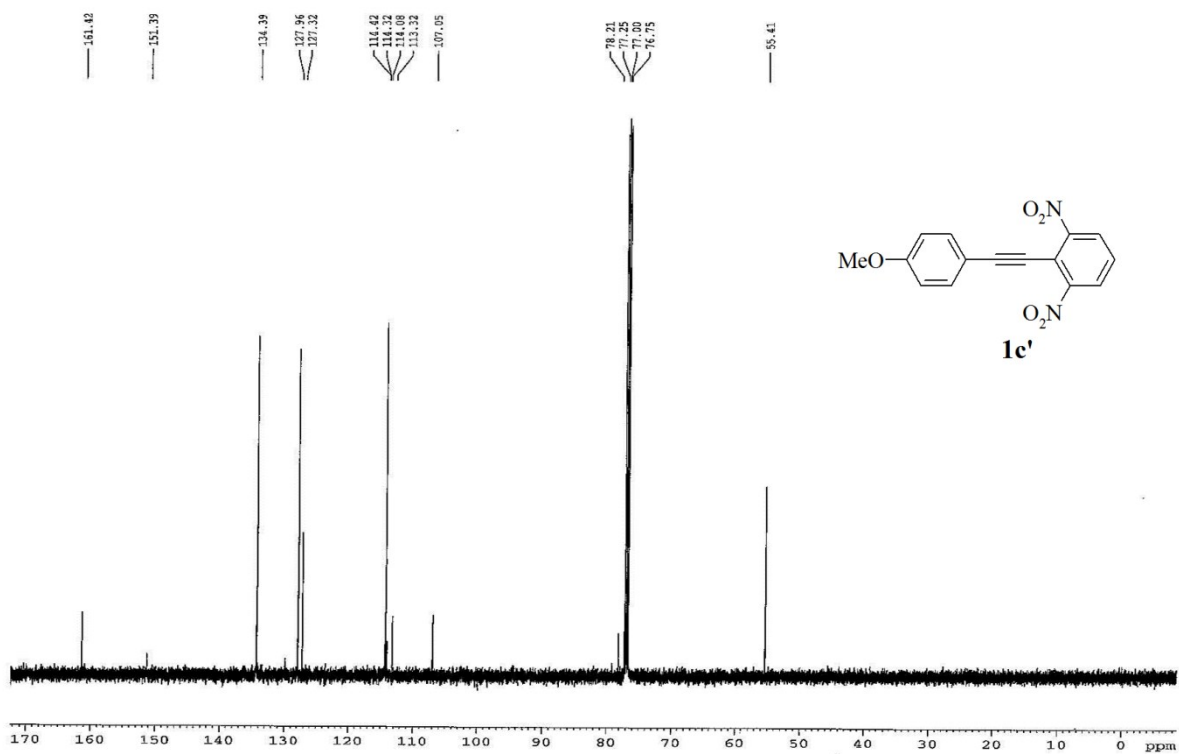

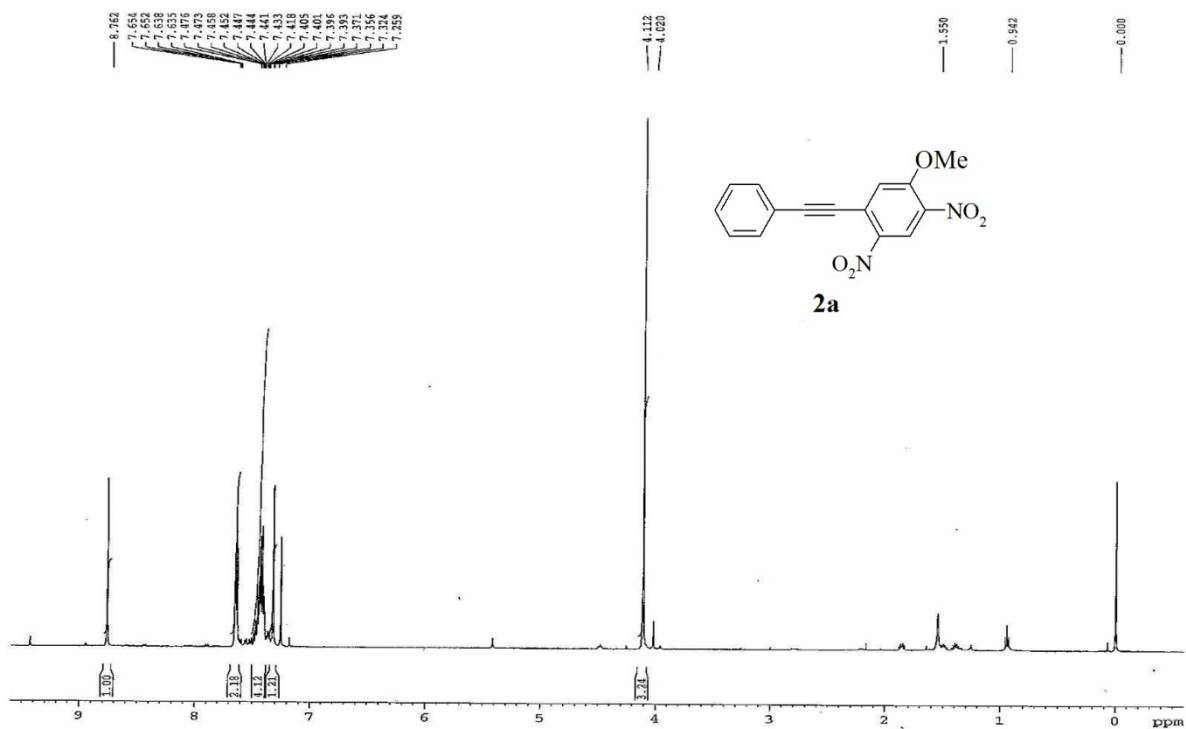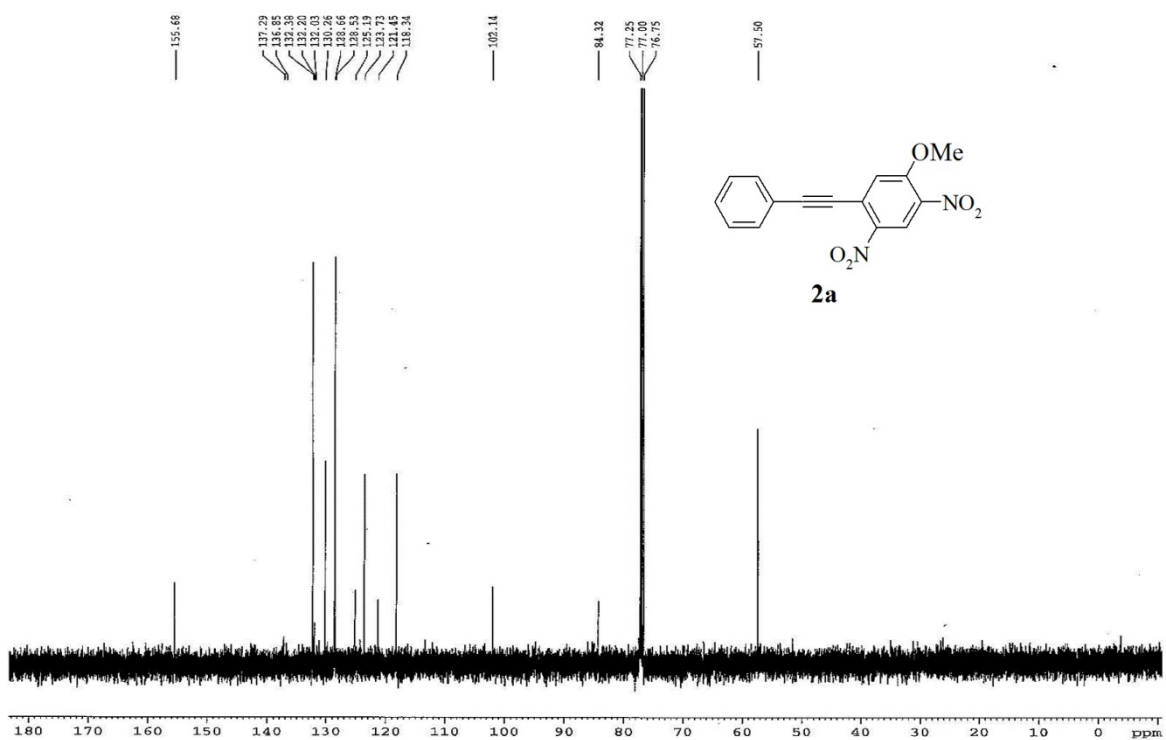

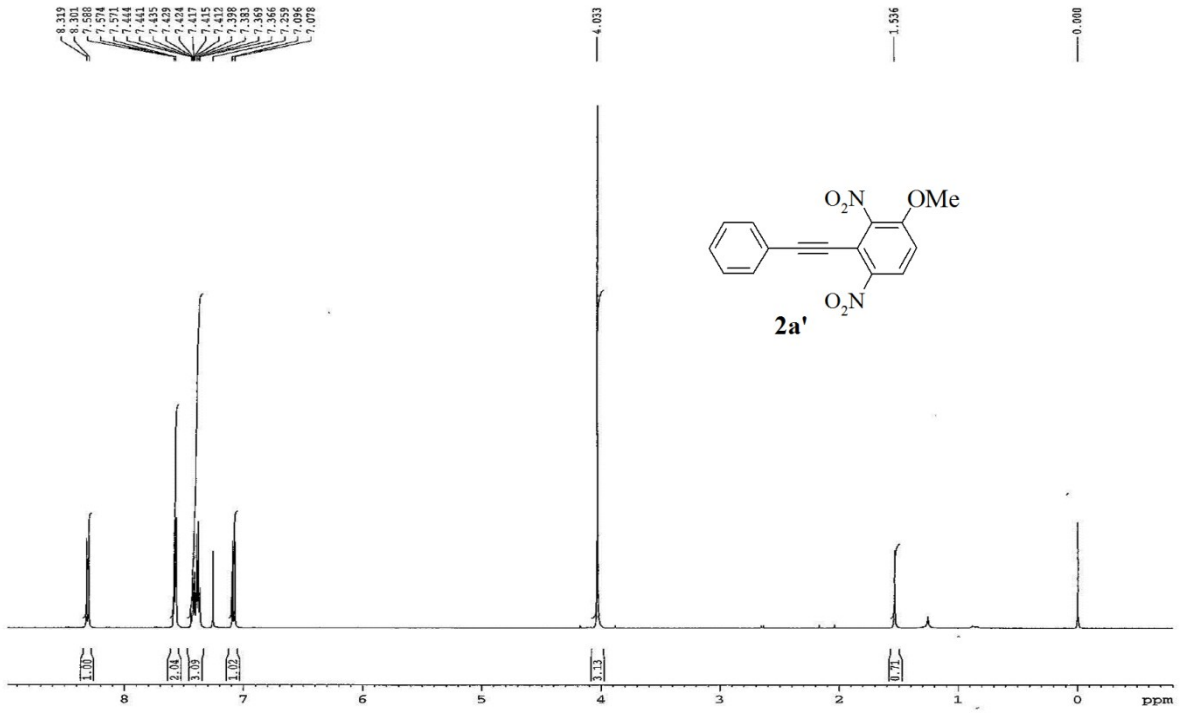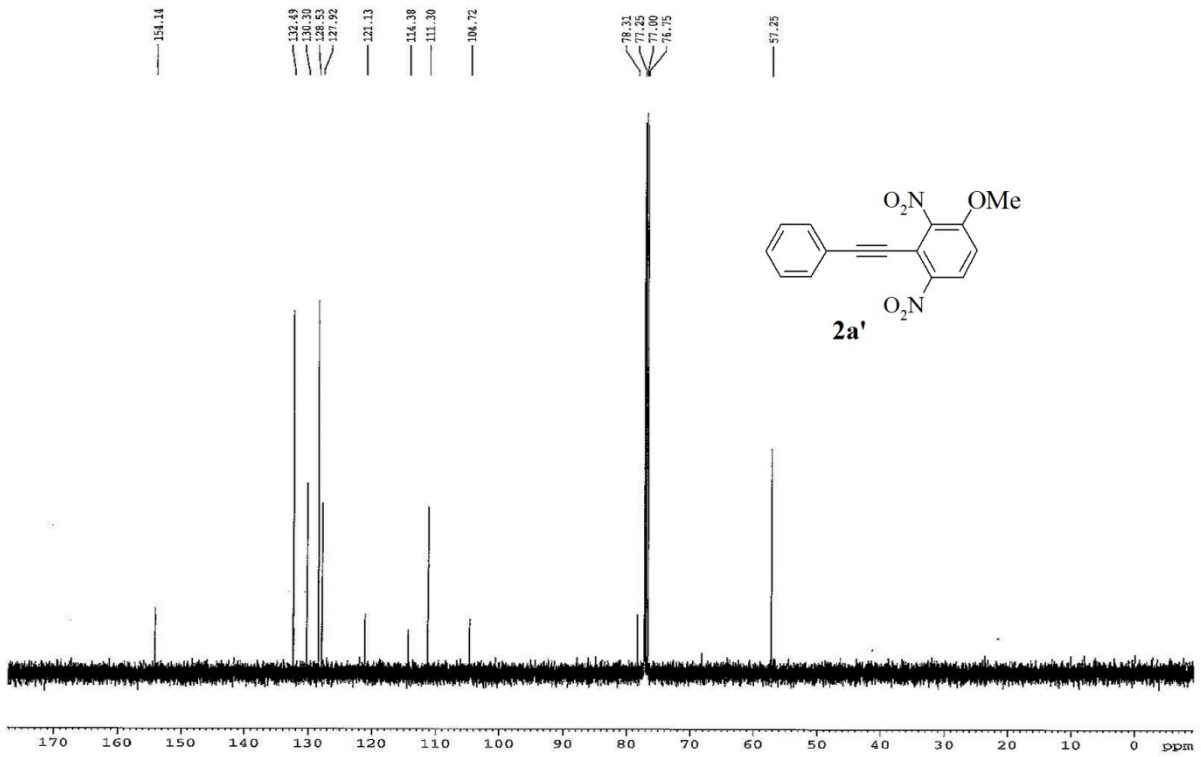

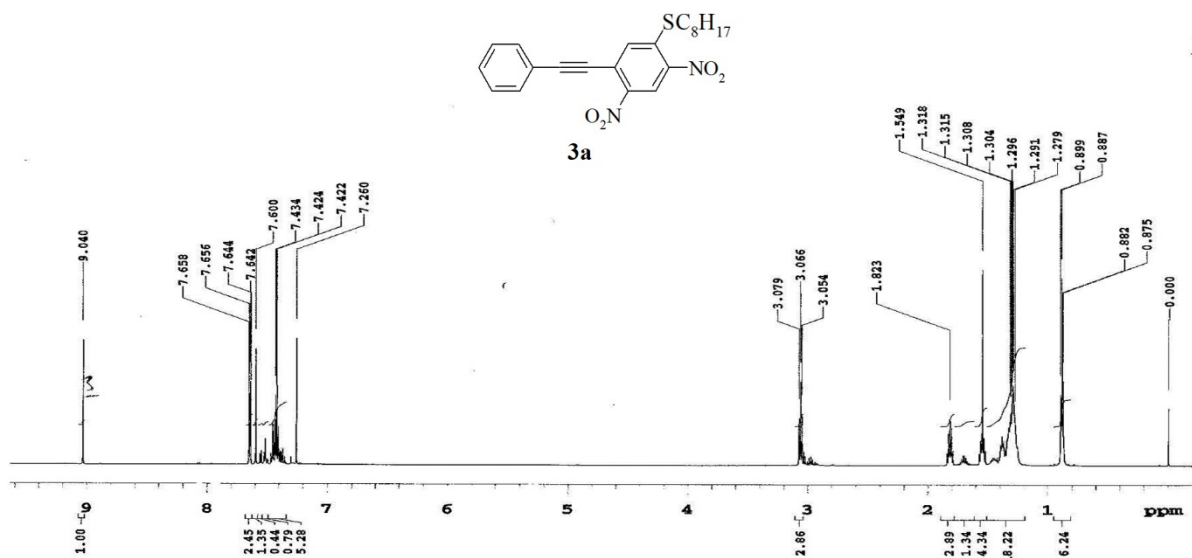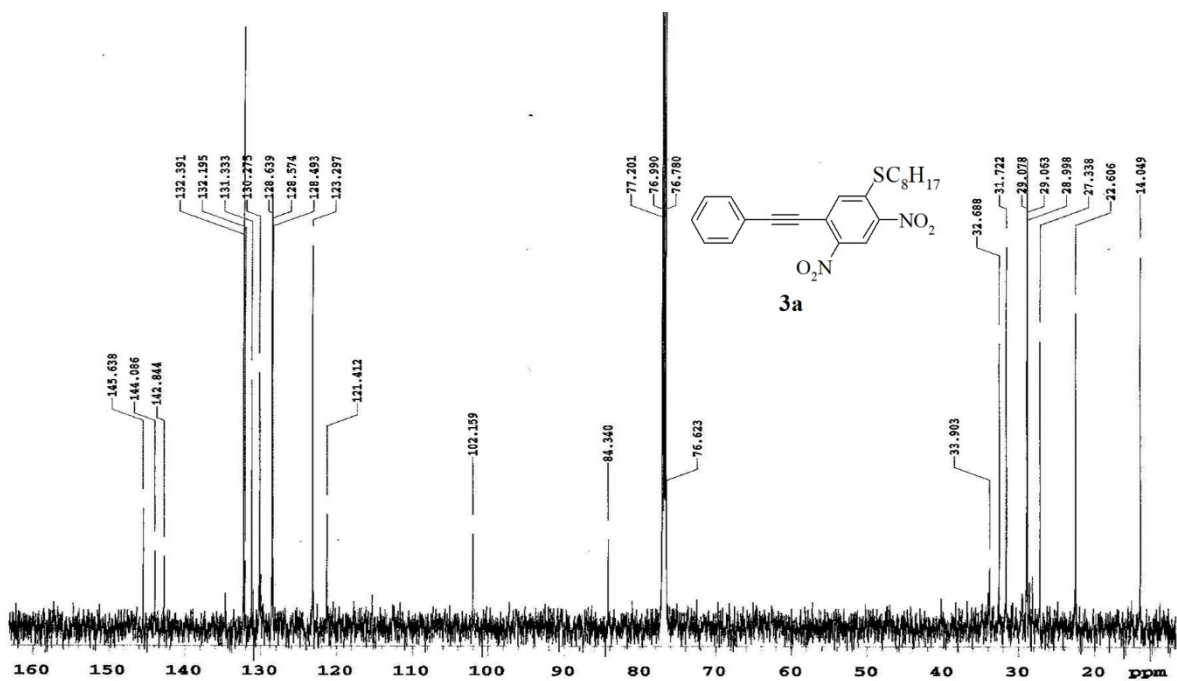

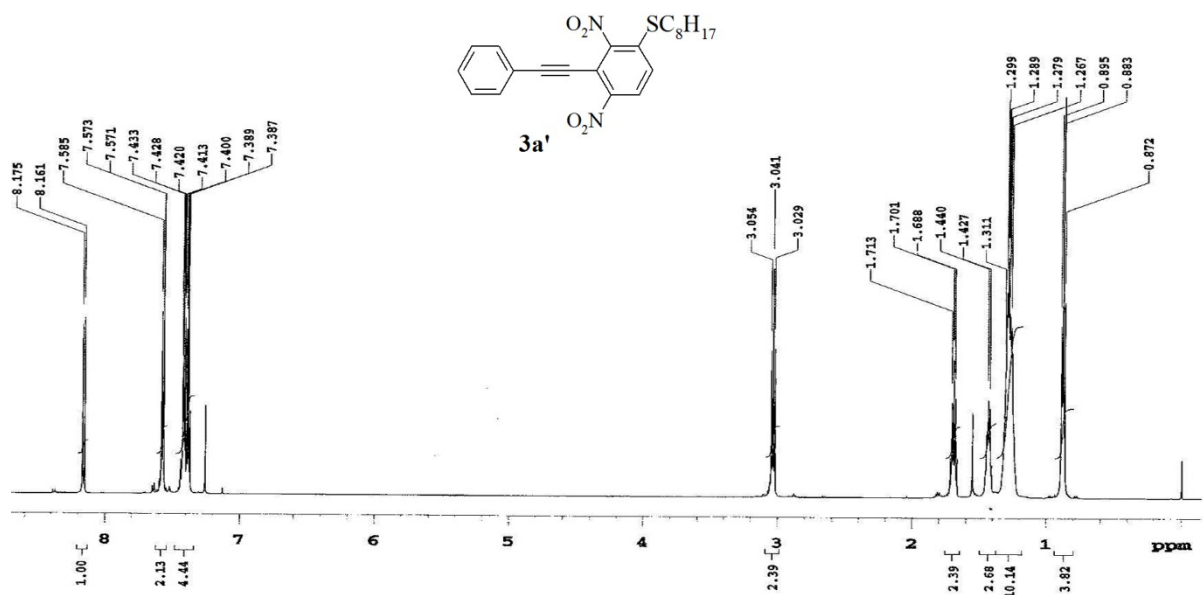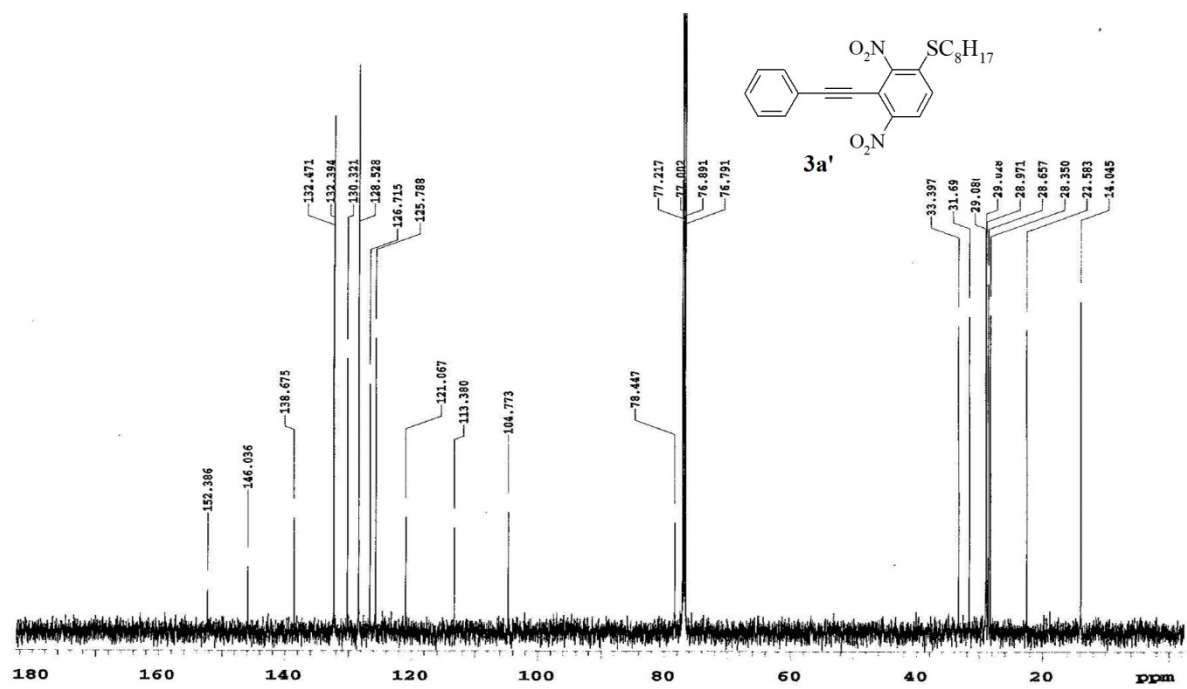

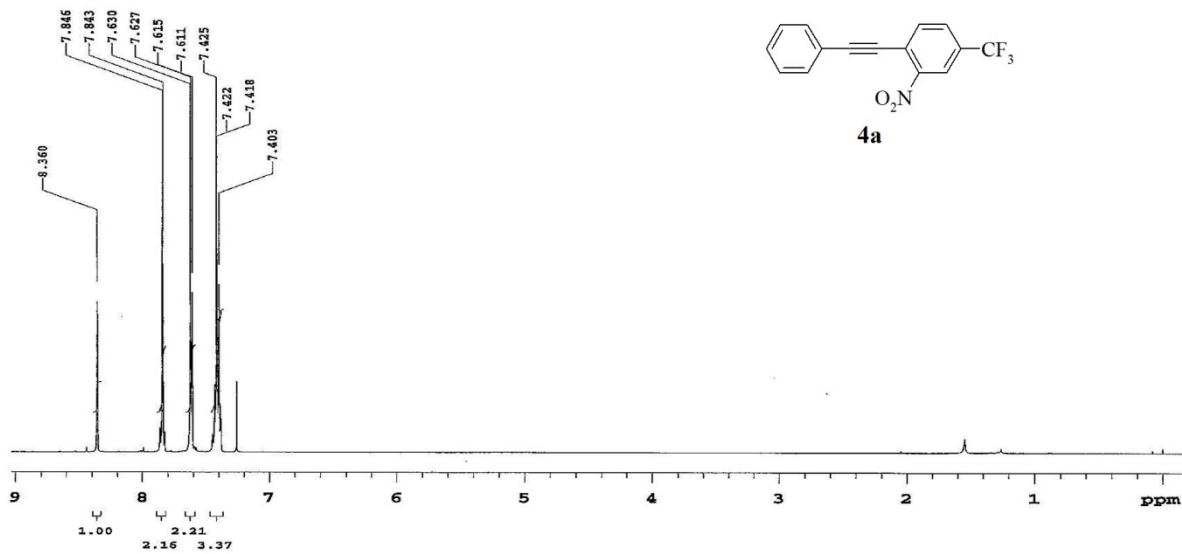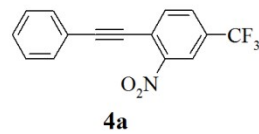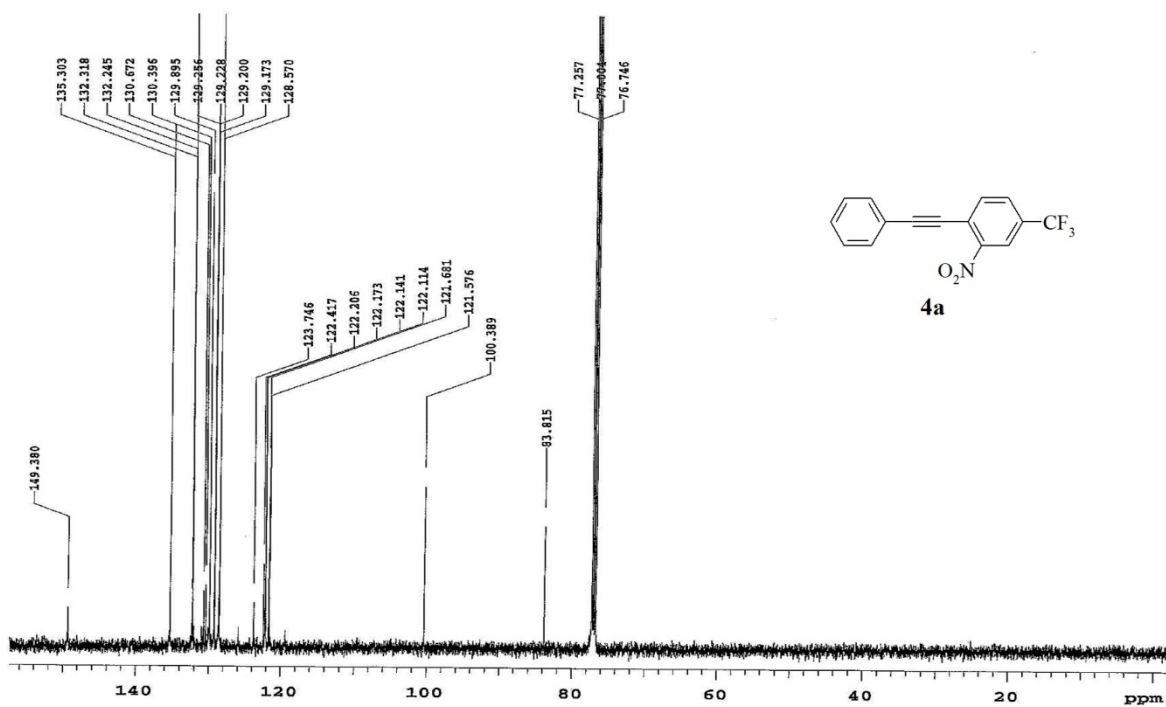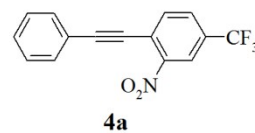



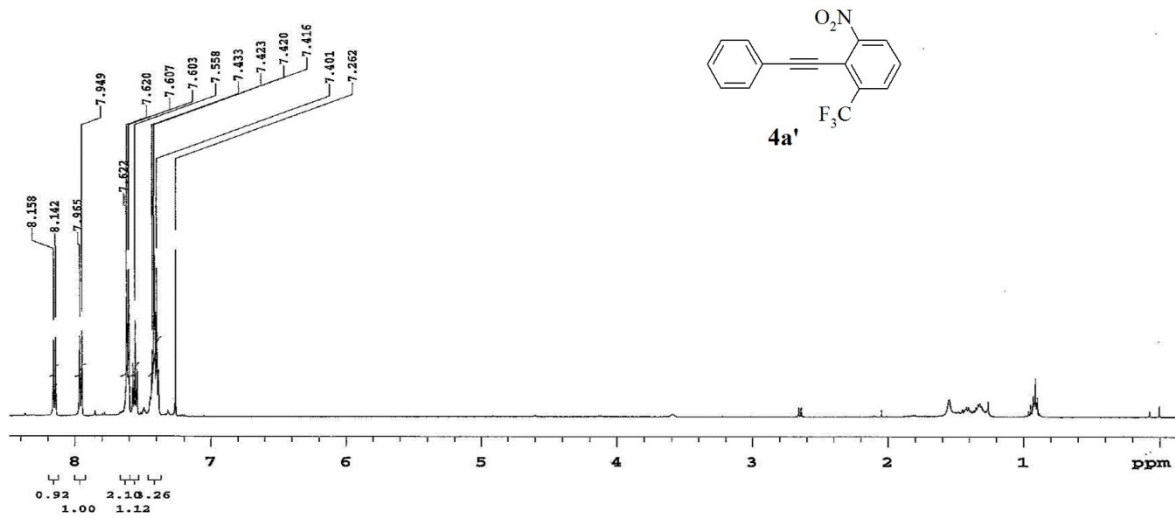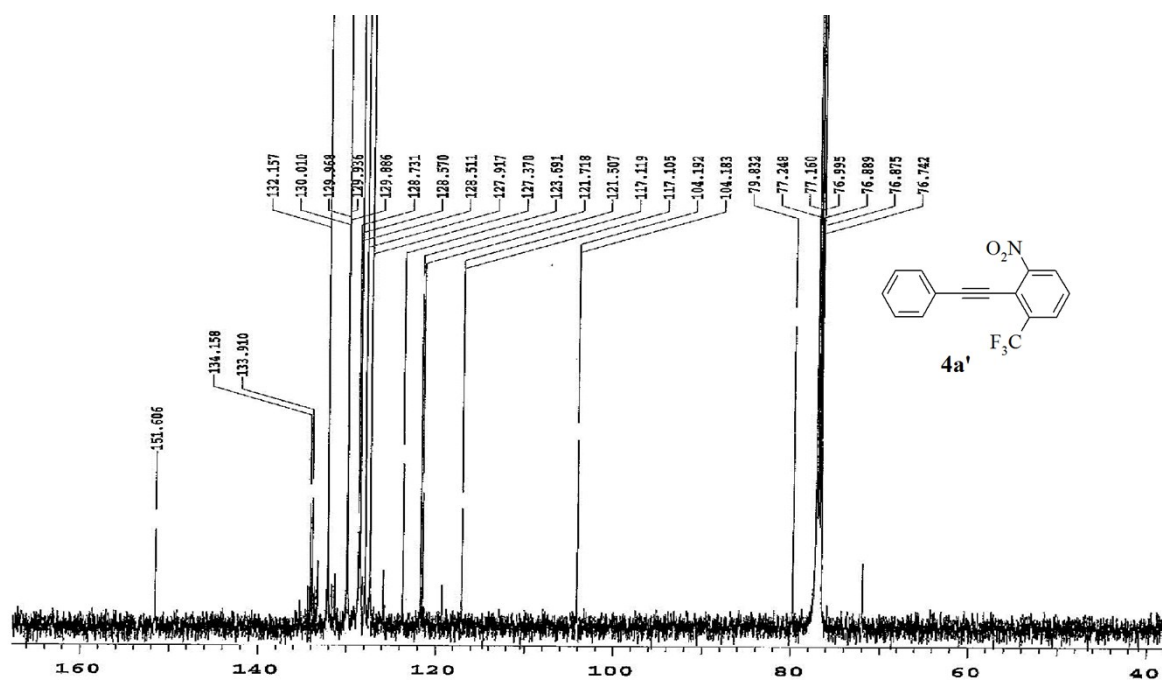

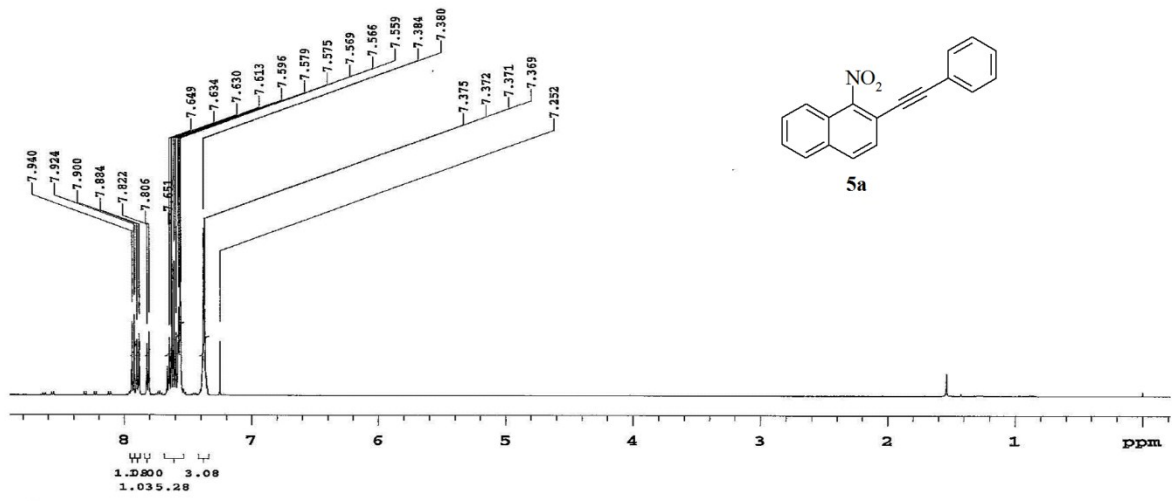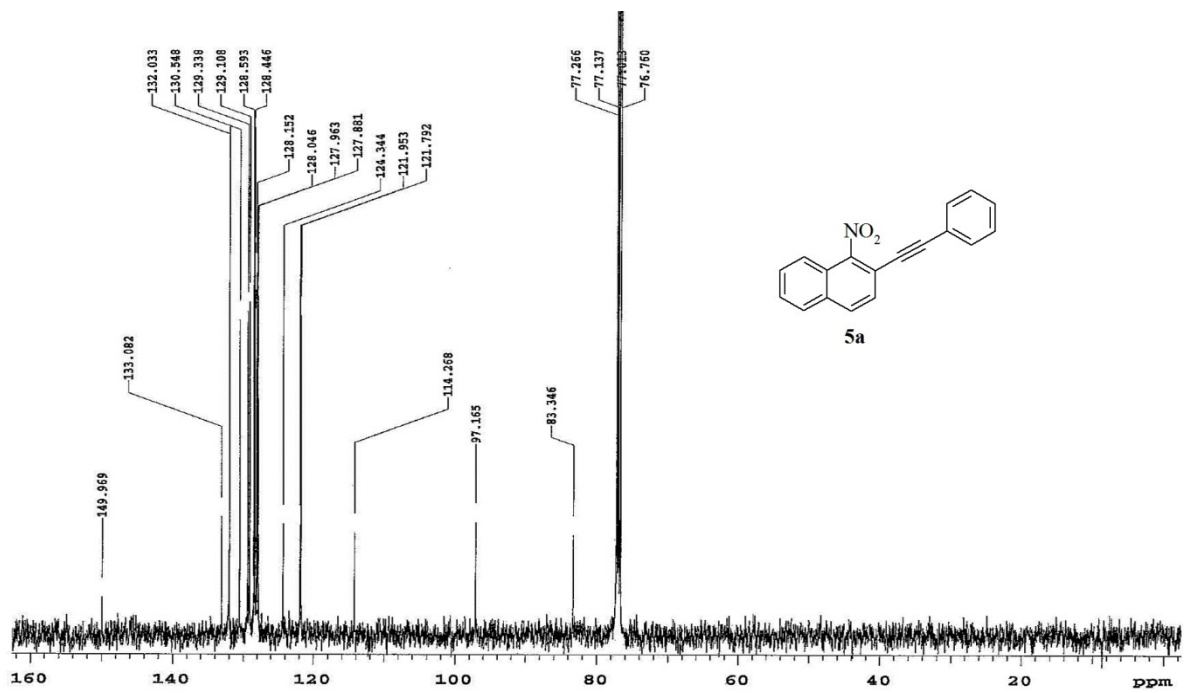

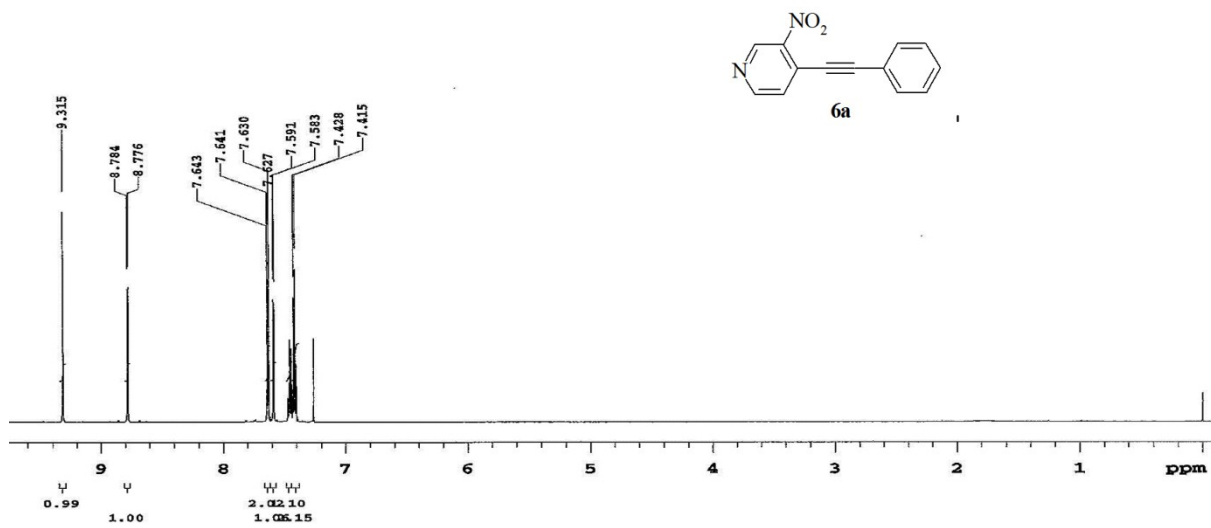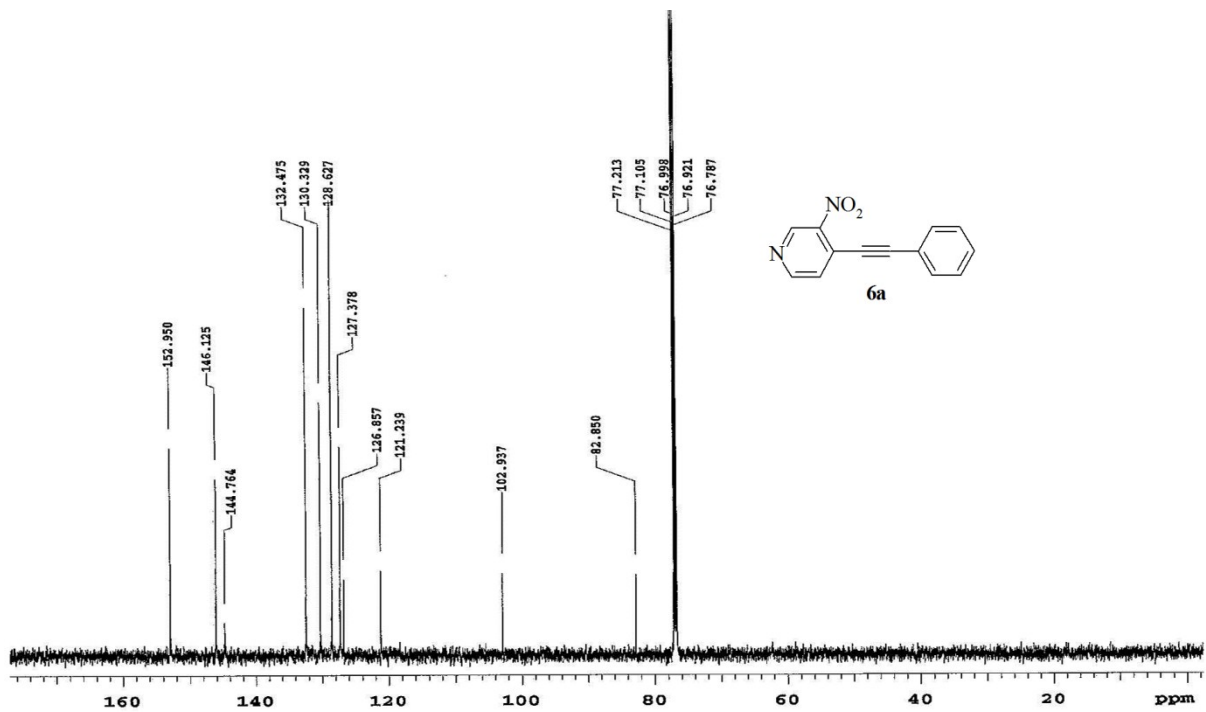

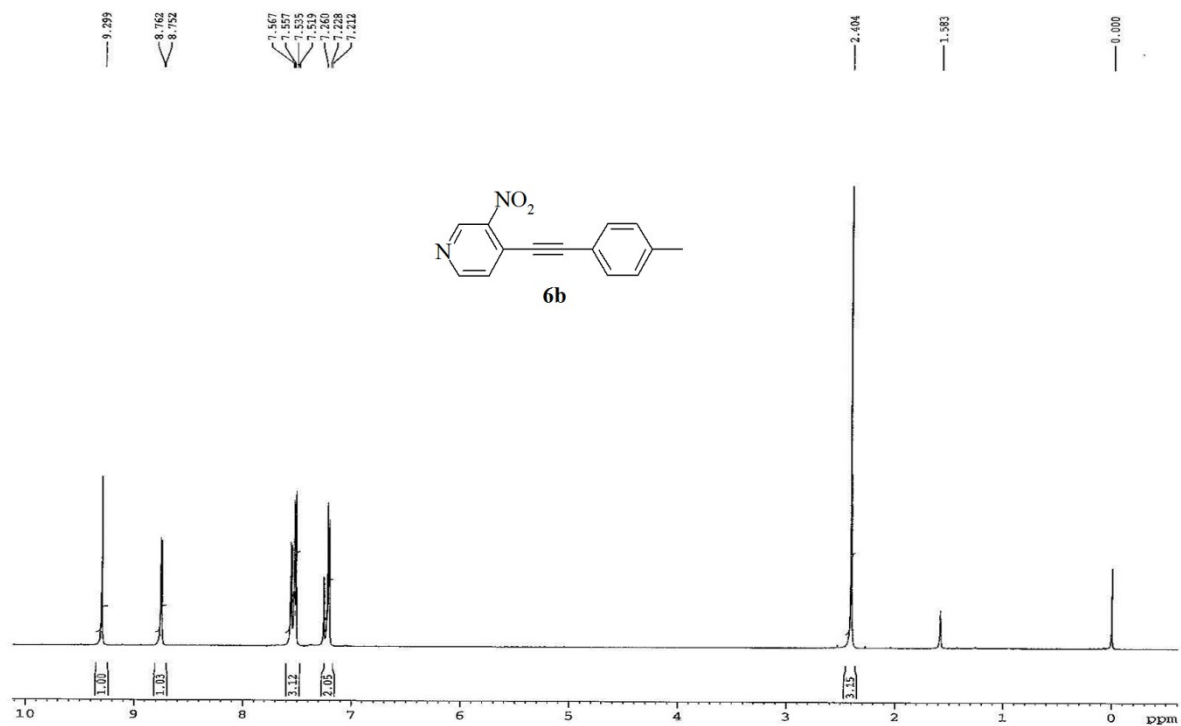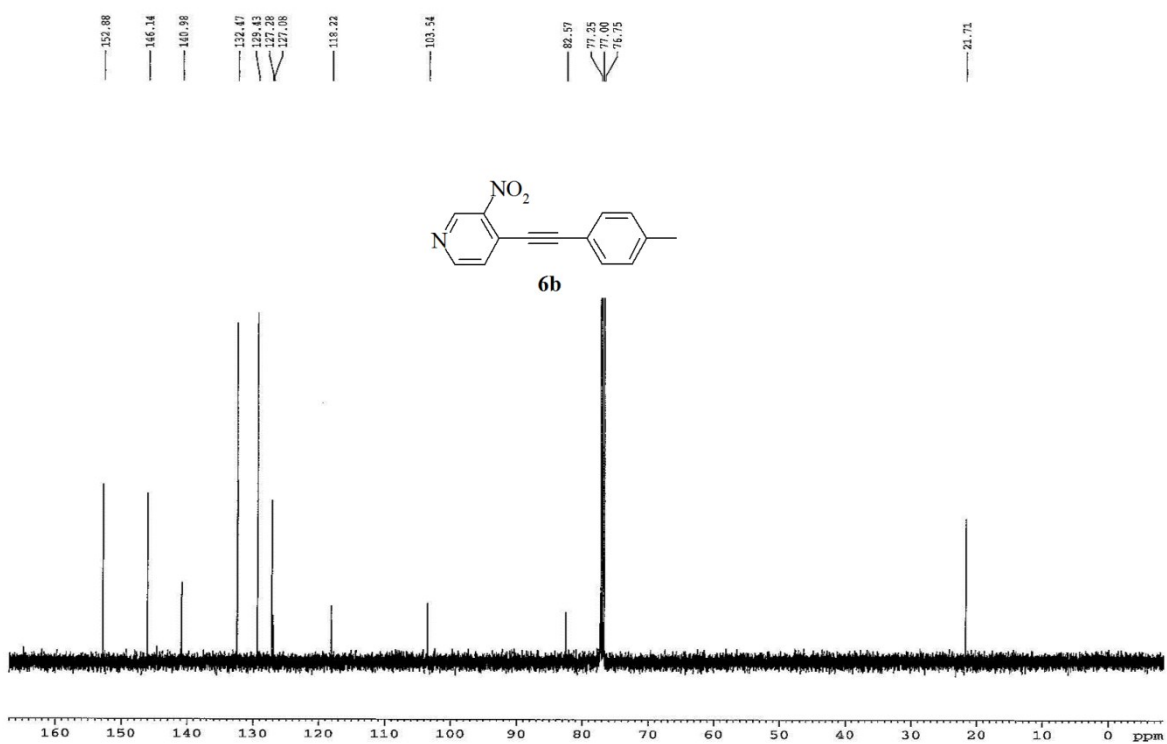

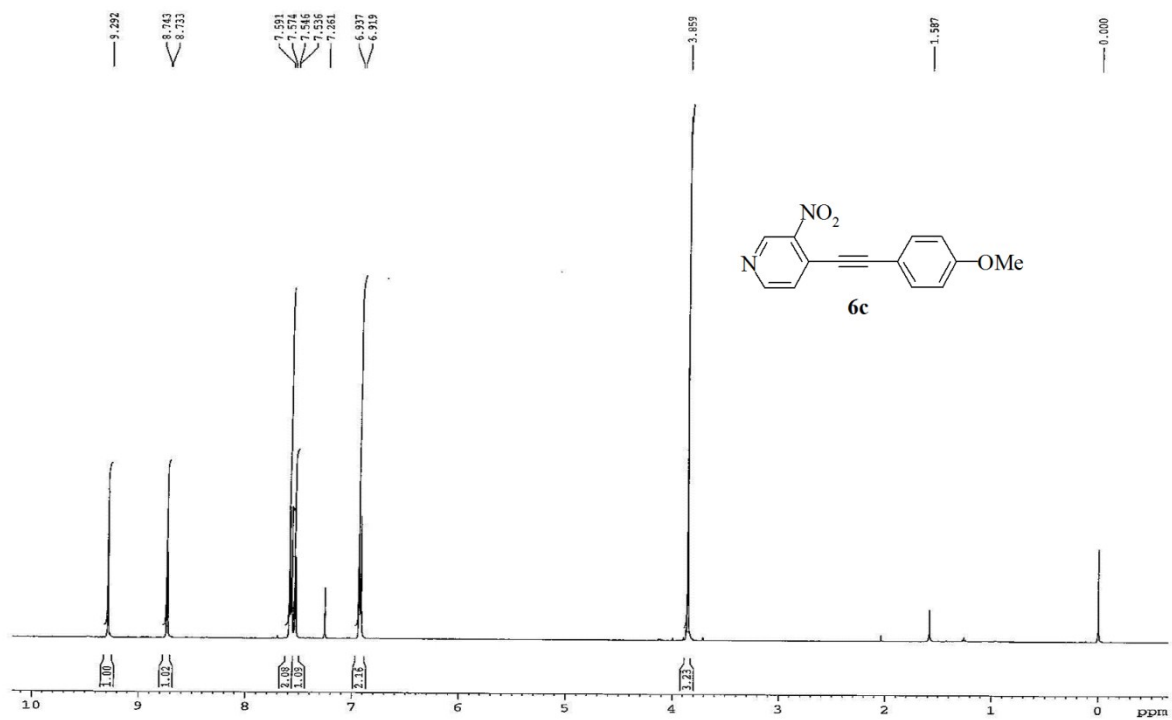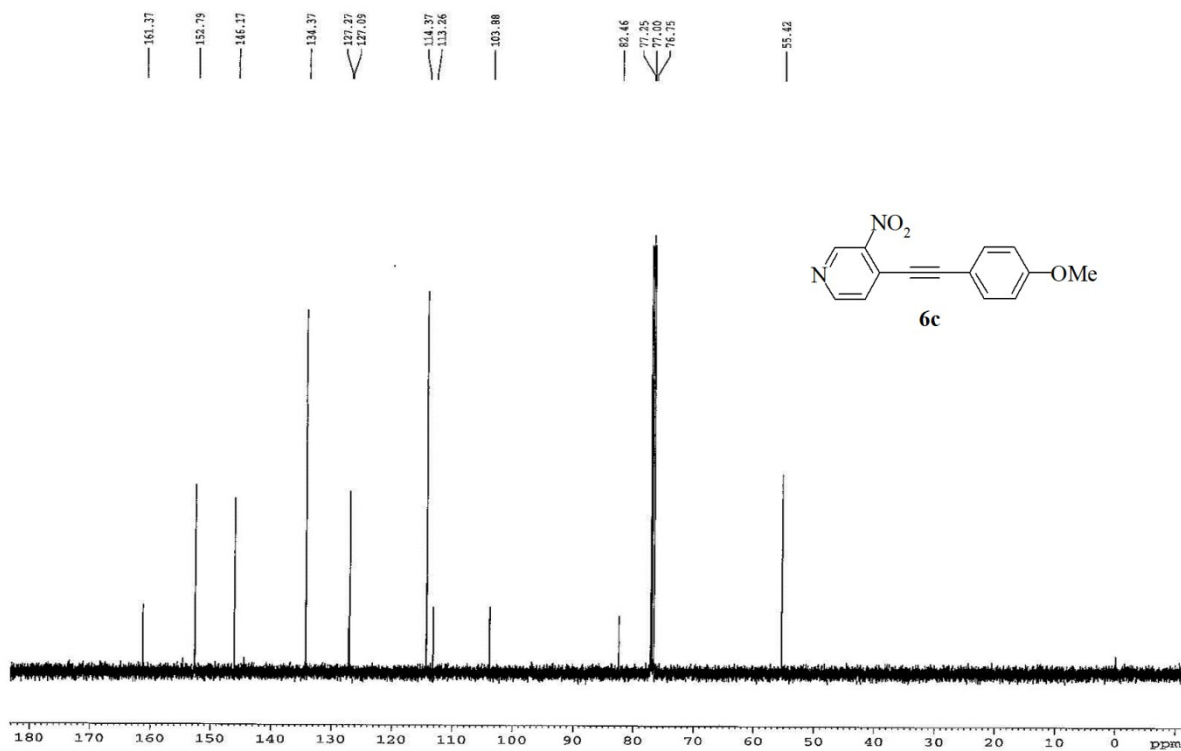

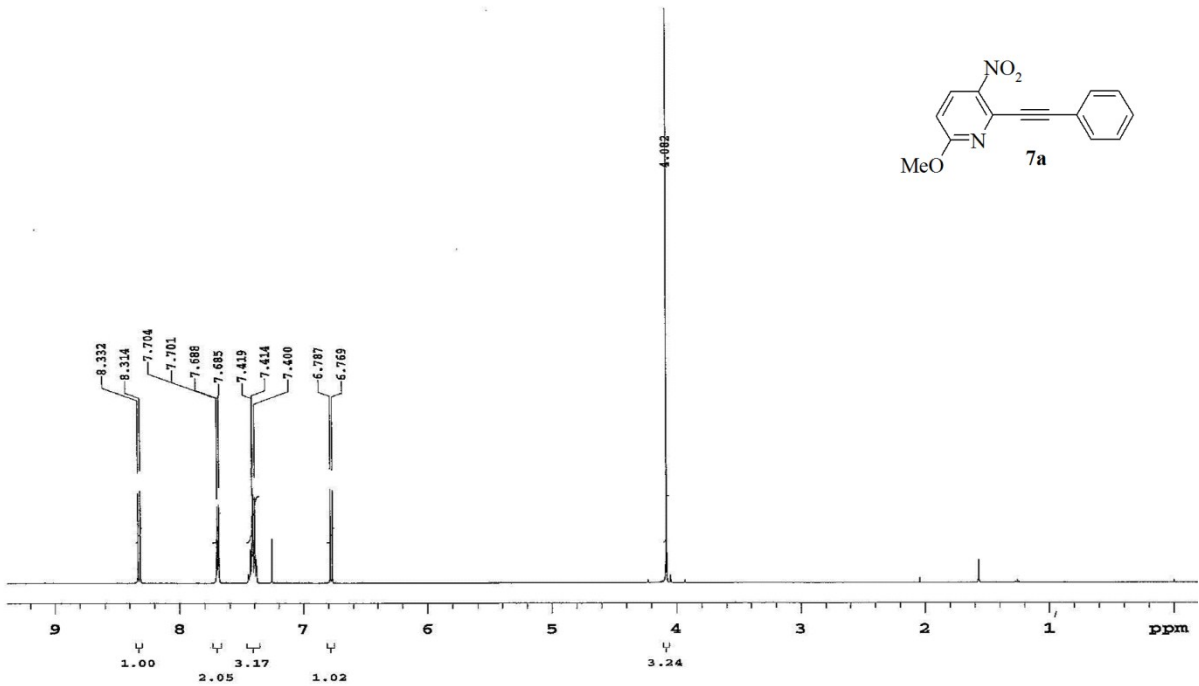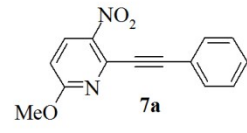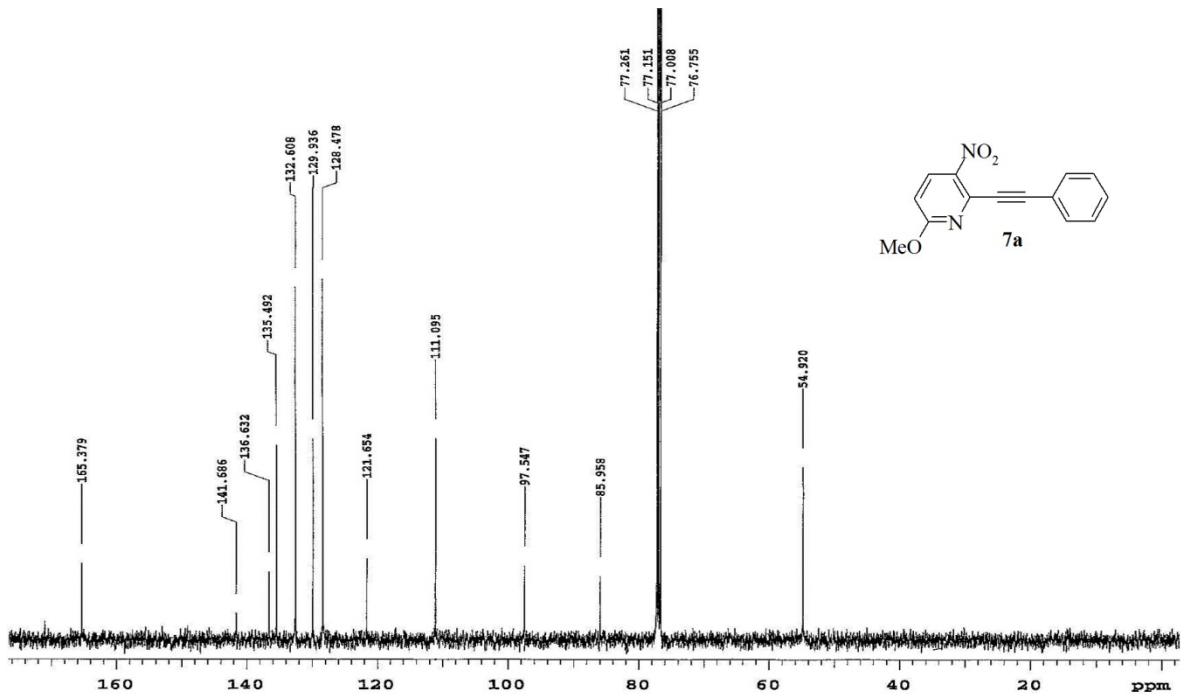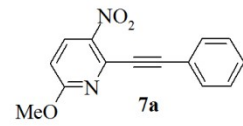

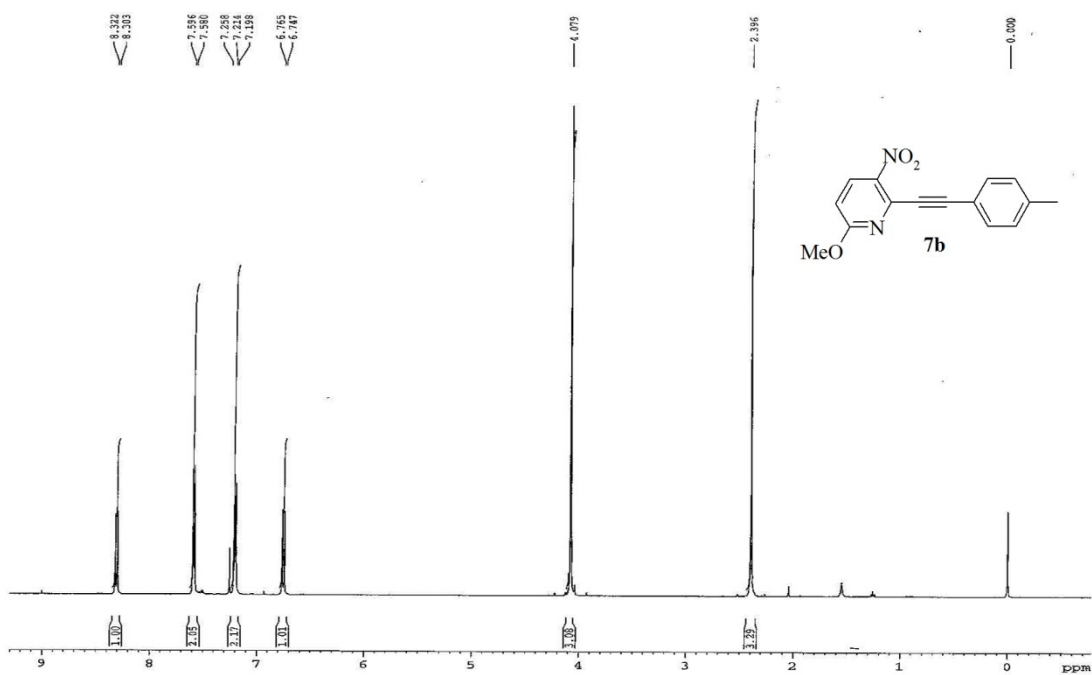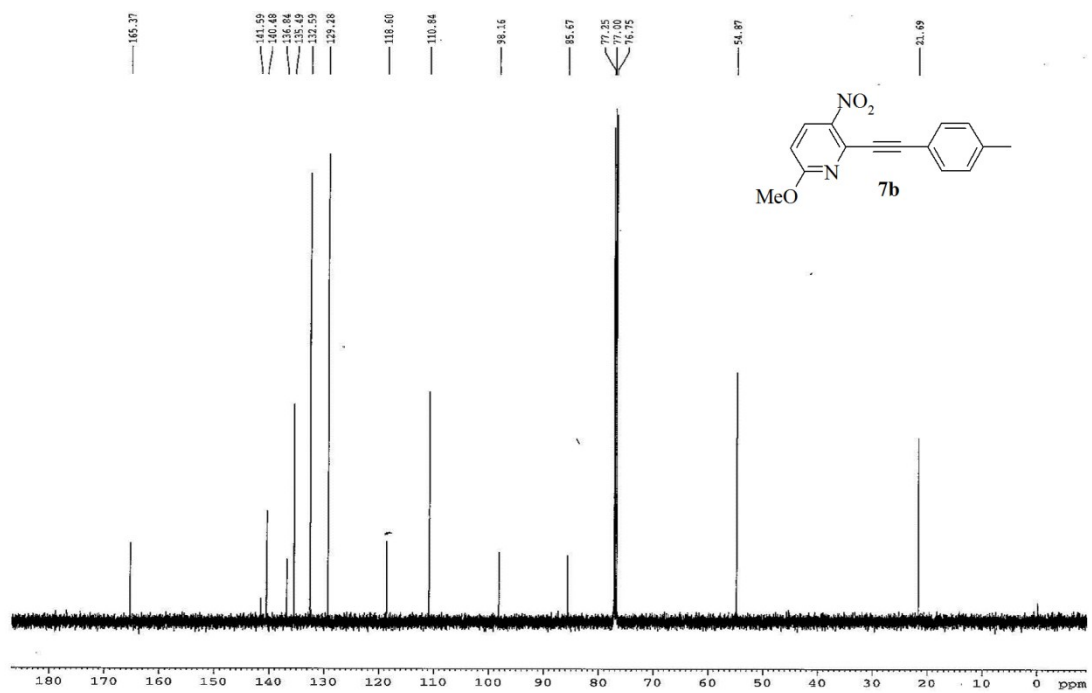

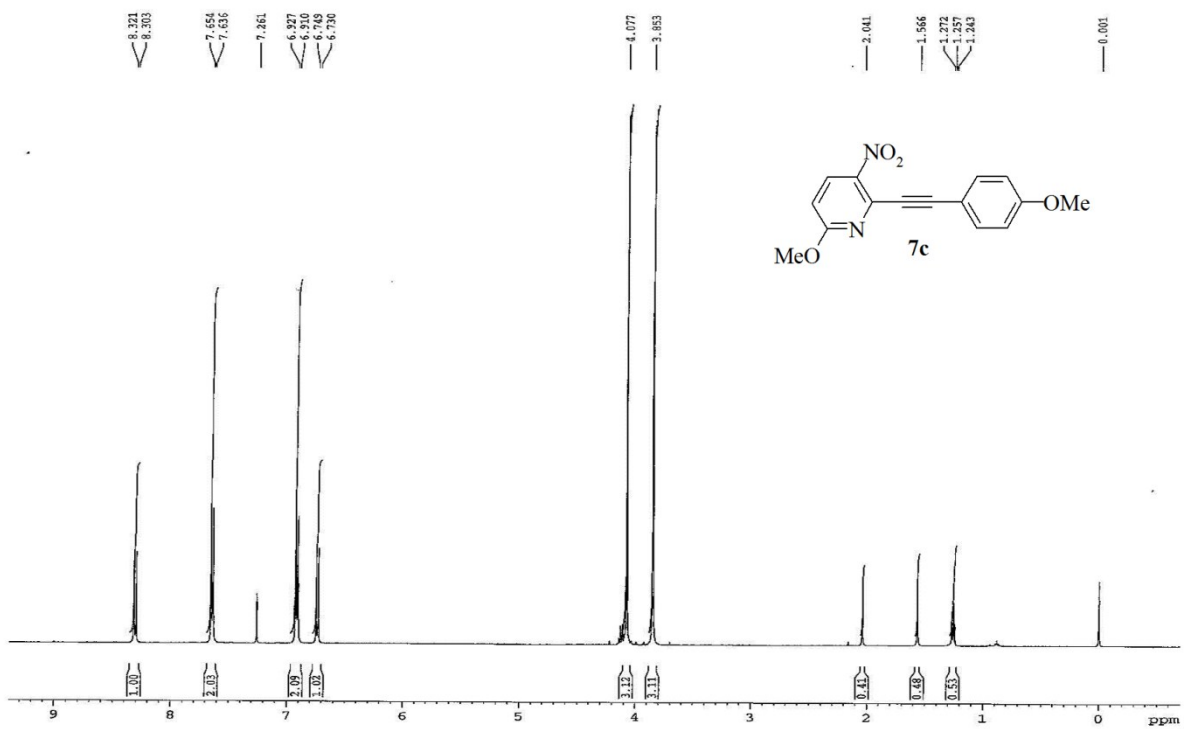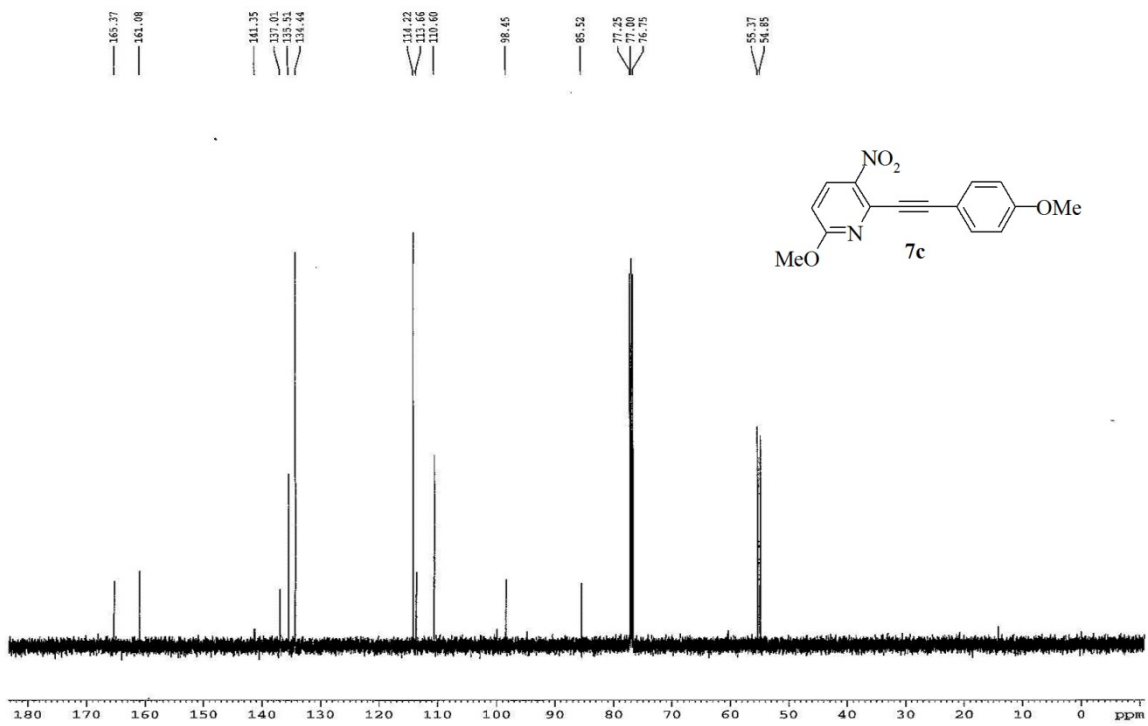



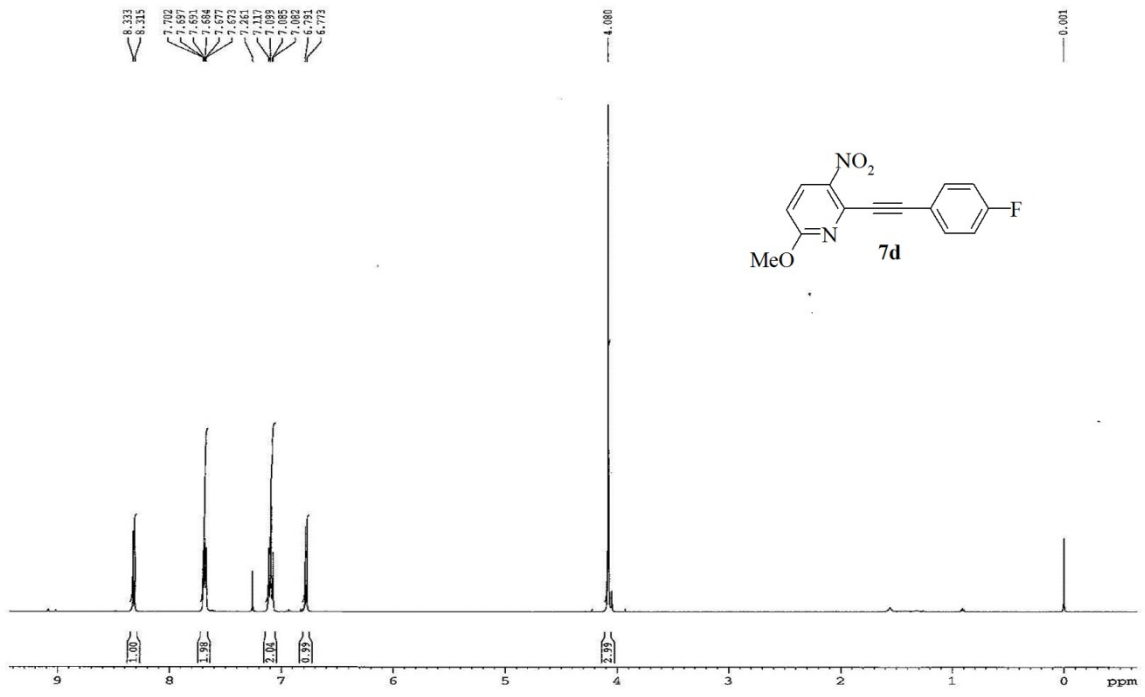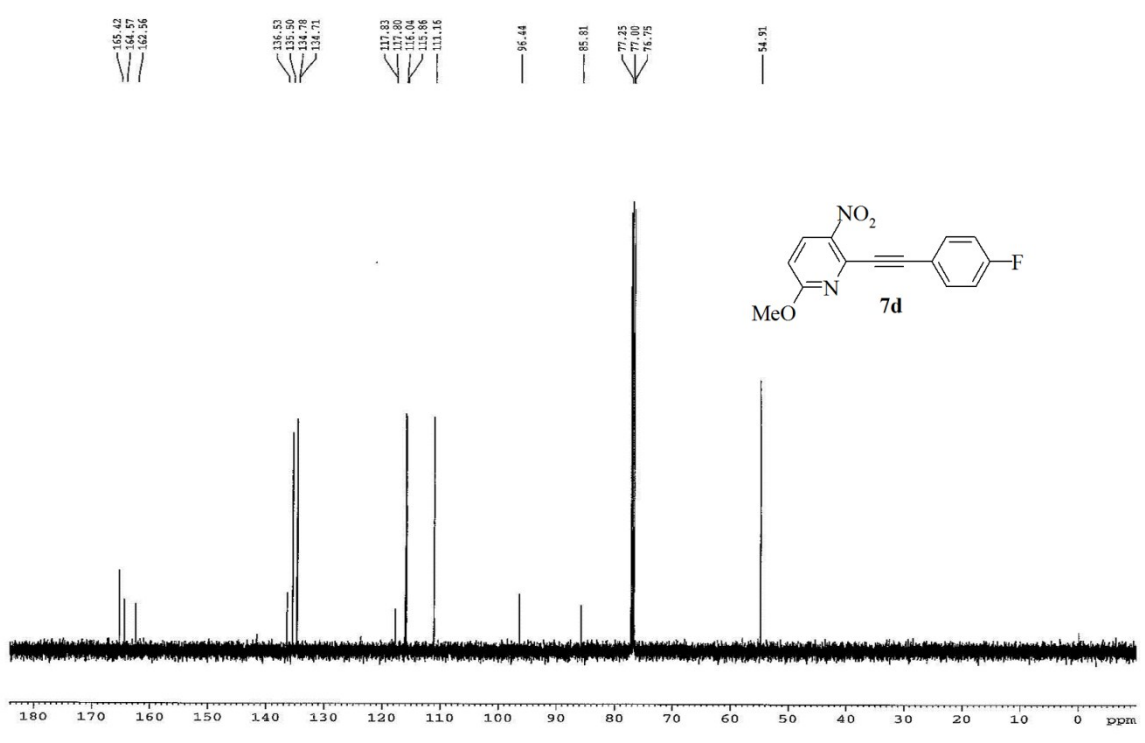

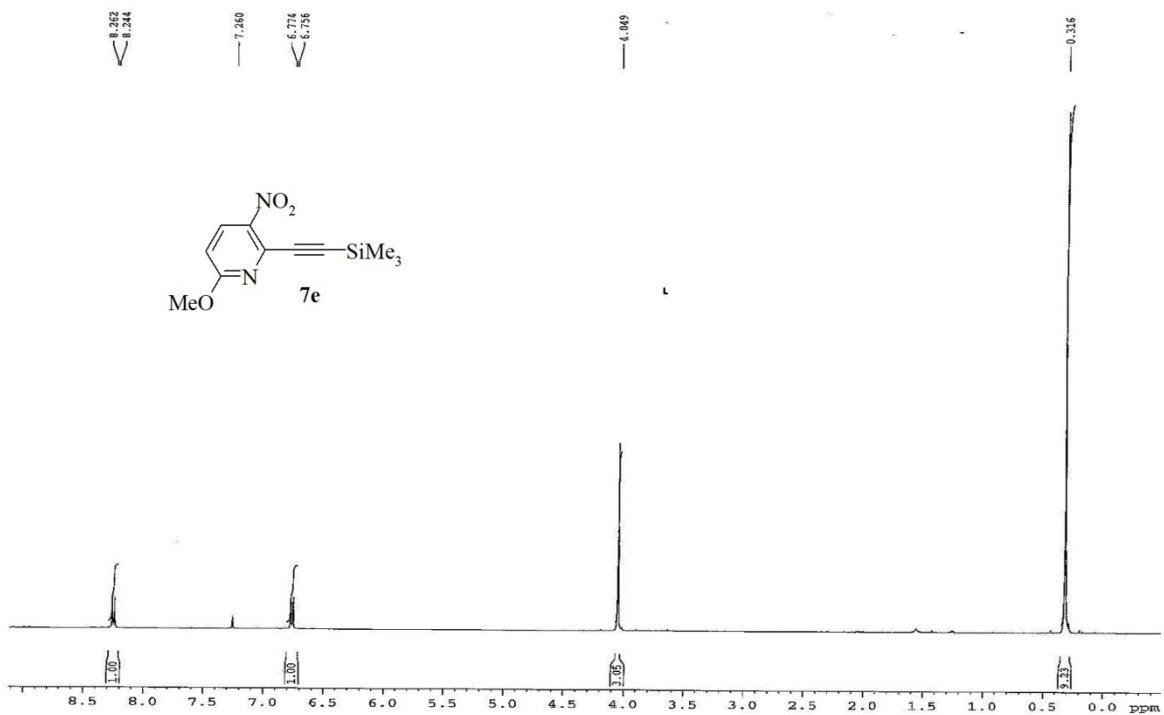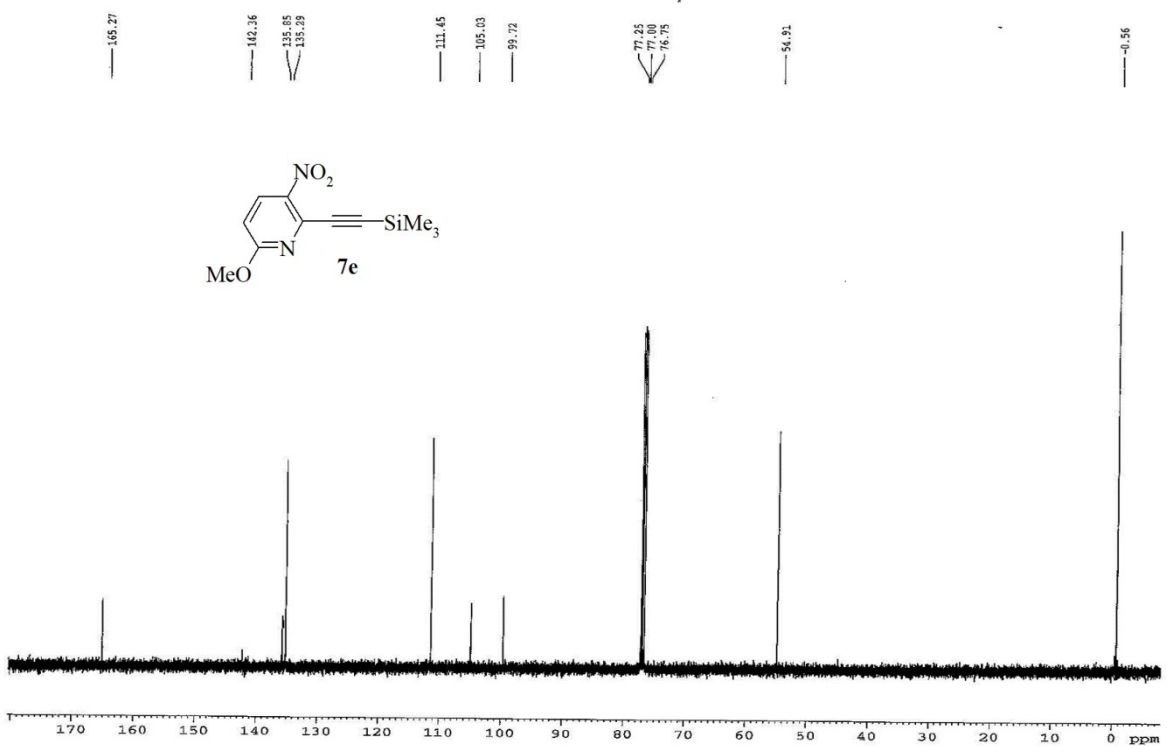

Supplement: c6cc07475h1.pdf [file c6cc07475h1.pdf]
